# Supplementary material for: Synthesis and DNA cleavage activity of triazacrown-anthraquinone conjugates
Source: Royal Society of Chemistry journal article supplement (doi:10.1039/c0nj00347f), 2010-01-01
Supplement: c0nj00347f.pdf [file c0nj00347f.pdf]

## Synthesis and DNA Cleavage Activity of Triazacrown-anthraquinone Conjugates

Weihong Xu, Xiaoli Yang, Lian Yang, Zhao-Li Jia, Li Wei, Fang Liu, and Guo-Yuan Lu\*

Department of Chemistry, State Key Laboratory of Coordination Chemistry, Nanjing University, Nanjing 210093, P.R.China

[lgyuan@nju.edu.cn](mailto:lgyuan@nju.edu.cn). (G.-Y. Lu).

### Table of Content

|                                                                                                                                  |           |
|----------------------------------------------------------------------------------------------------------------------------------|-----------|
| 1. ESI-MS and NMR spectra (Figure S1 - S12)                                                                                      | P2 ~ P8   |
| 2. Fluorescence emission spectra of EB-DNA system and the effect of ionic strength on the DNA binding (Figure S13 and Table S 1) | P9        |
| 3. Agarose gel of pH dependence (Figure S14)                                                                                     | P10       |
| 4. Agarose gel of Concentration dependence (Figure S15 - S16)                                                                    | P10       |
| 5. DNA cleavage by <b>4a</b> or <b>4b</b> (control assays) (Figure S17 and Table S2)                                             | P11       |
| 6. Kinetic data (Table S3 – S4 and Figure S18)                                                                                   | P12 ~ P32 |
| 7. Radical scavengers' and EDTA' inhibition (Figure S19 – S20 and Table S5-S6)                                                   | P33 ~ P34 |
| 8. ESI-MS analysis of ApA (Figure S21)                                                                                           | P35 ~ P37 |
| 9. UV-visible spectra and fluorescence emission spectra of compounds <b>1</b> and <b>2</b> (Figure S22 – S24)                    | P38 ~ 40  |

### 1. ESI-MS and NMR spectra

#### ESI-MS and NMR spectra of 1

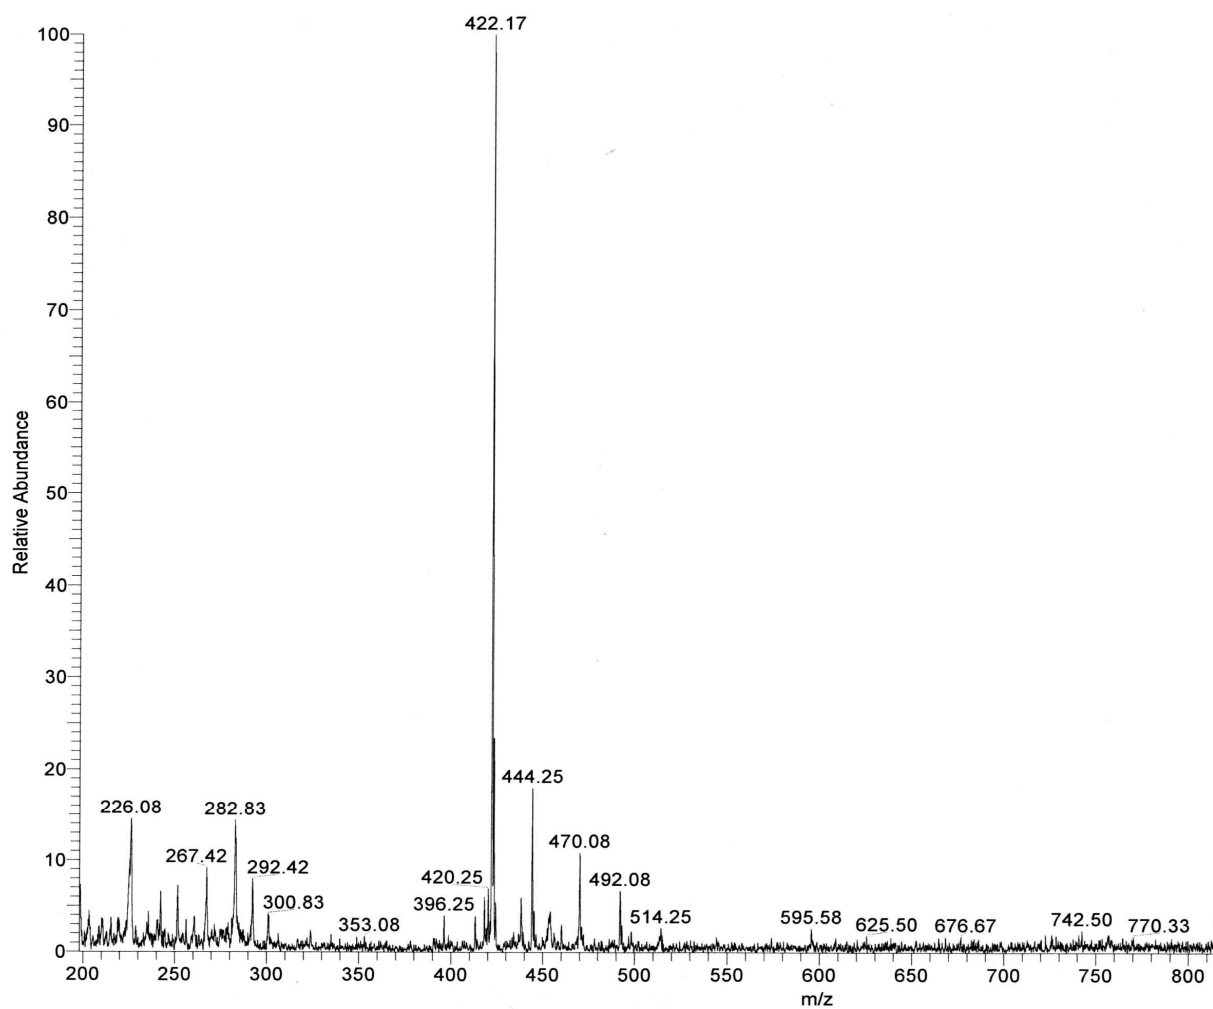

Figure S1. ESI-MS spectra of 1

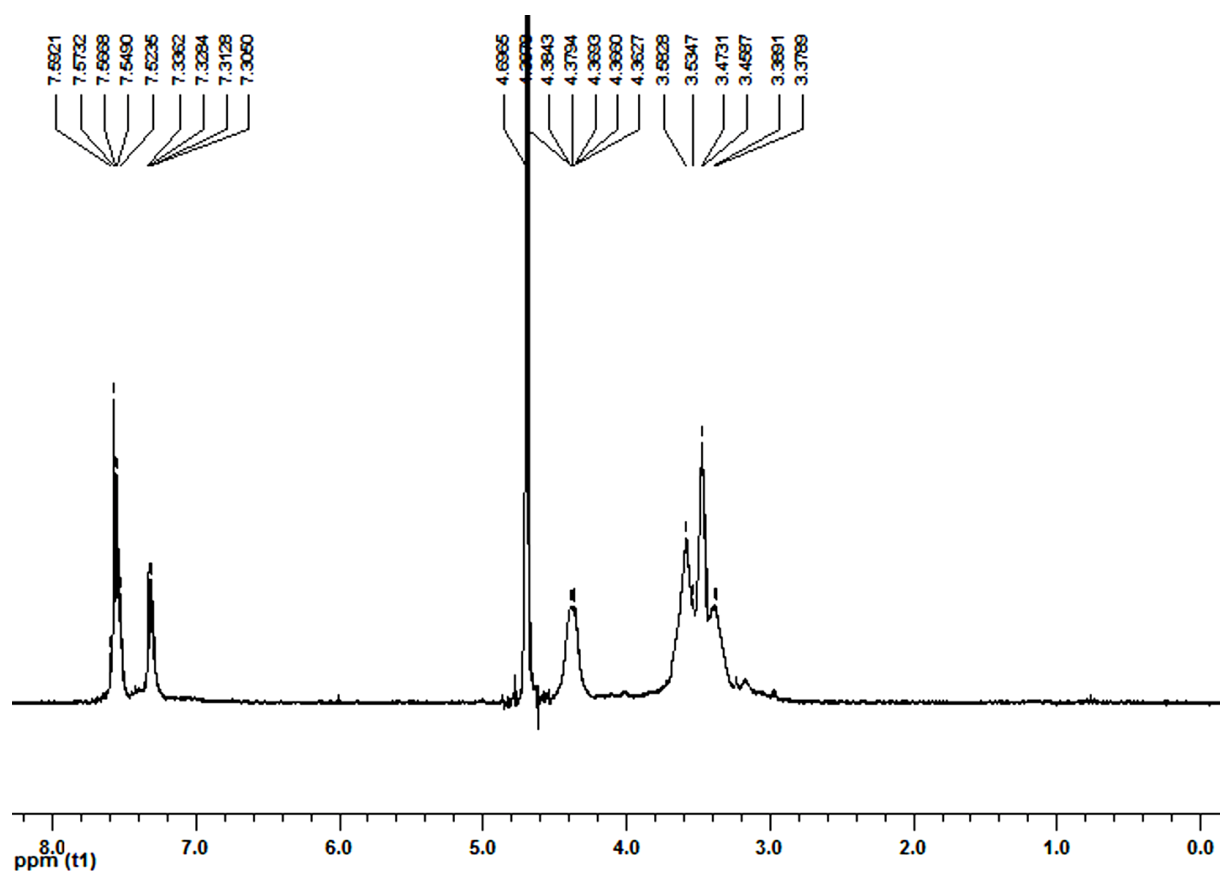

Figure S2.  $^1\text{H}$  NMR (300 MHz,  $\text{D}_2\text{O}$ ) of 1

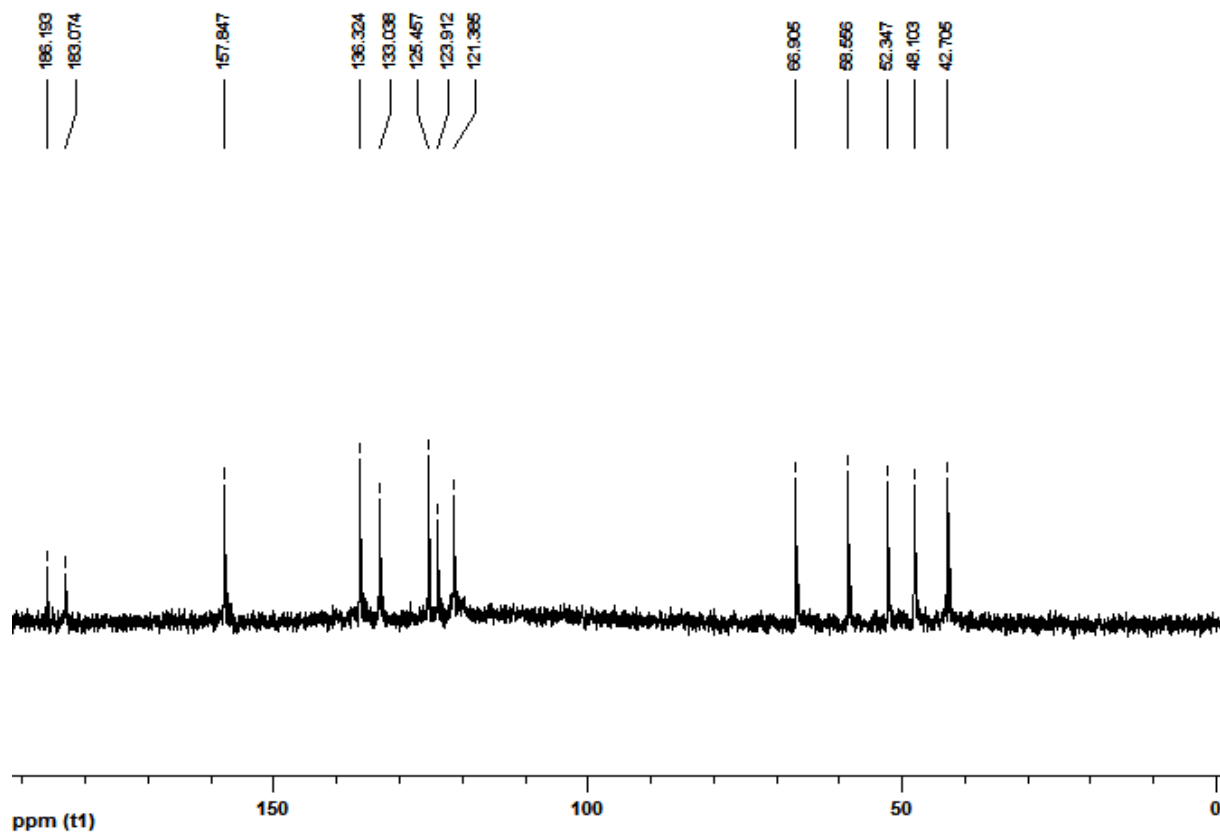

Figure S3.  $^{13}\text{C}$  NMR (300 MHz,  $\text{D}_2\text{O}$ ) of 1

ESI-MS and NMR spectra of 2

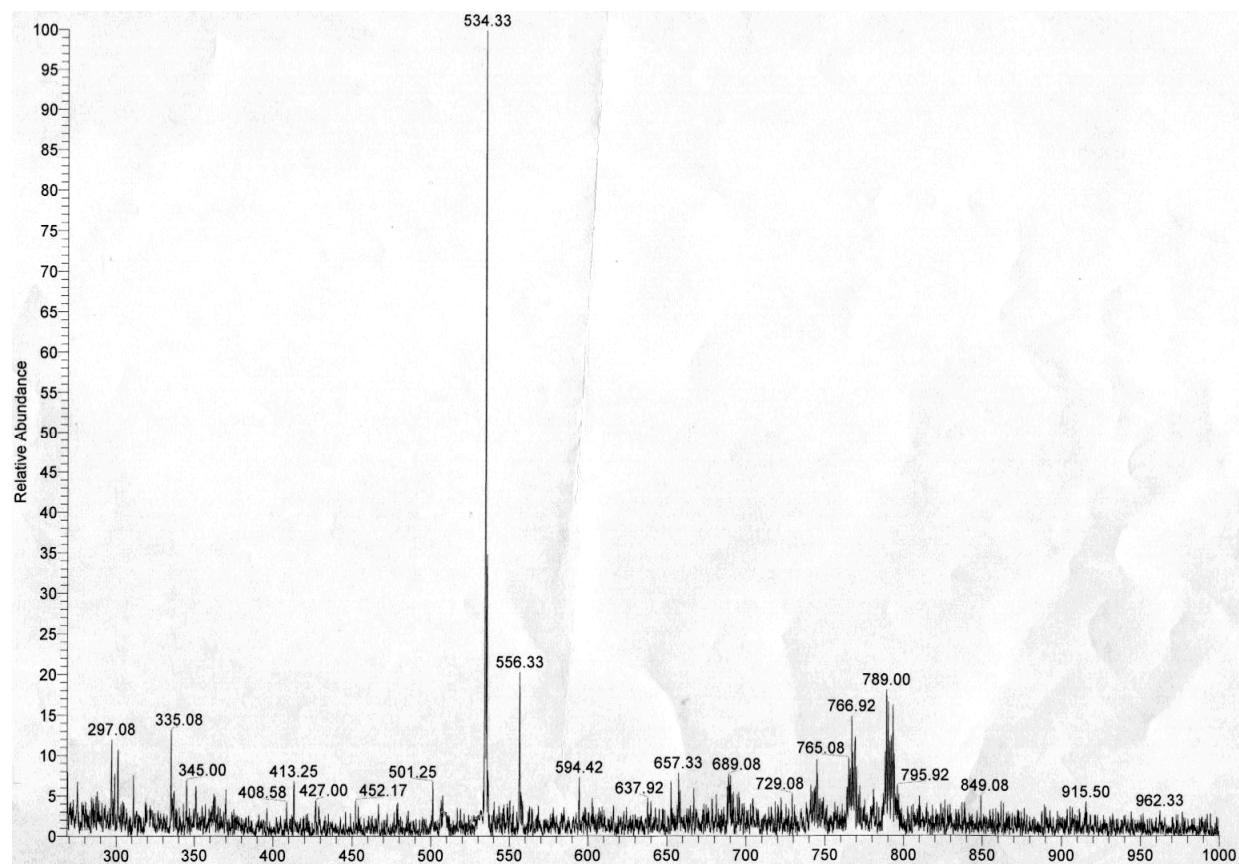

Figure S4. ESI-MS spectra of 2

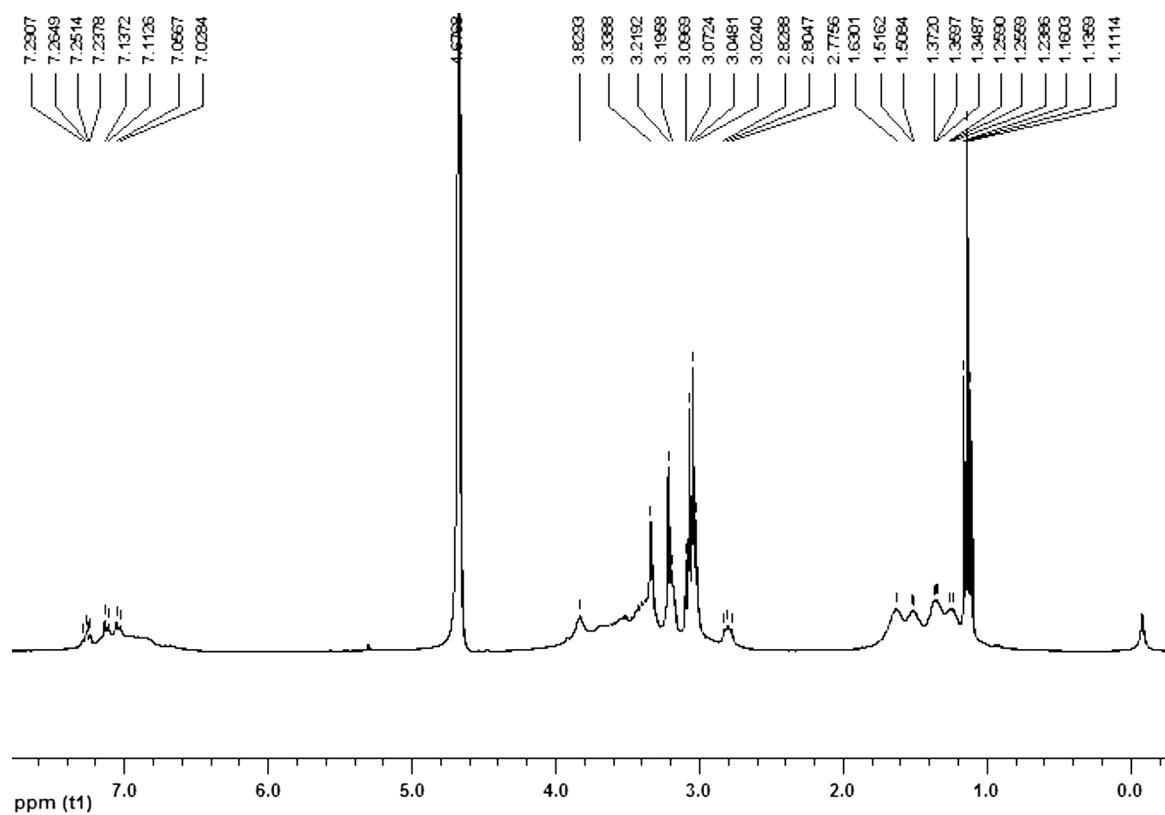

Figure S5.  $^1\text{H}$  NMR (300 MHz,  $\text{D}_2\text{O}$ ) of 2

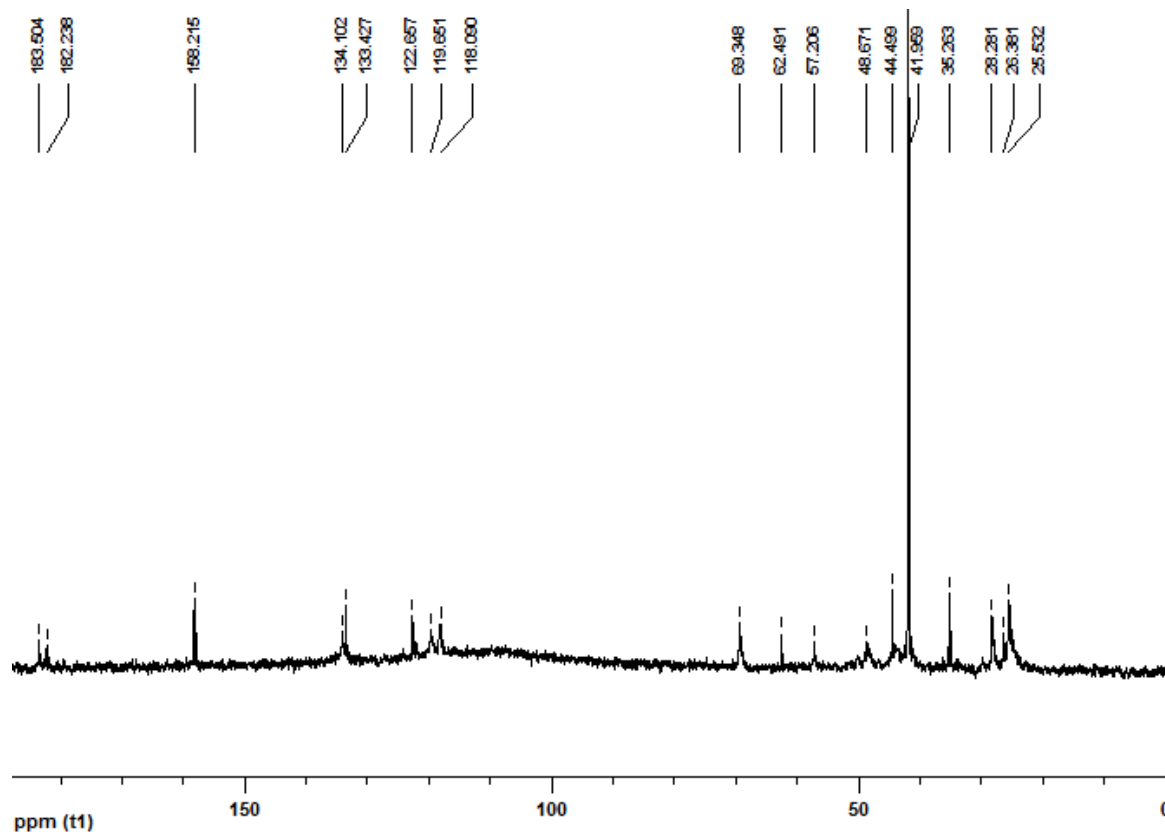

Figure S6.  $^{13}\text{C}$  NMR (300 MHz,  $\text{D}_2\text{O}$ ) of 2

NMR spectra of 3

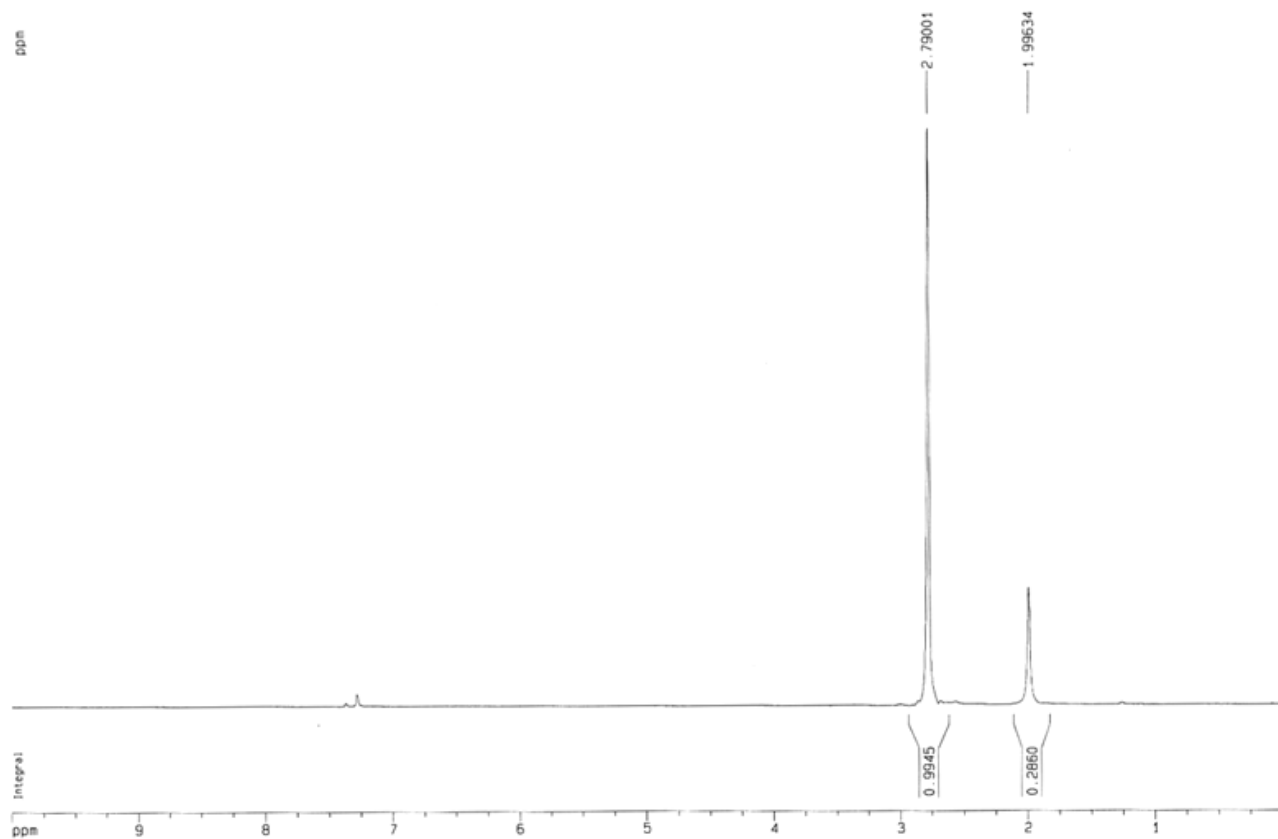

Figure S7. <sup>1</sup>H NMR (300 MHz, CDCl<sub>3</sub>) of 3

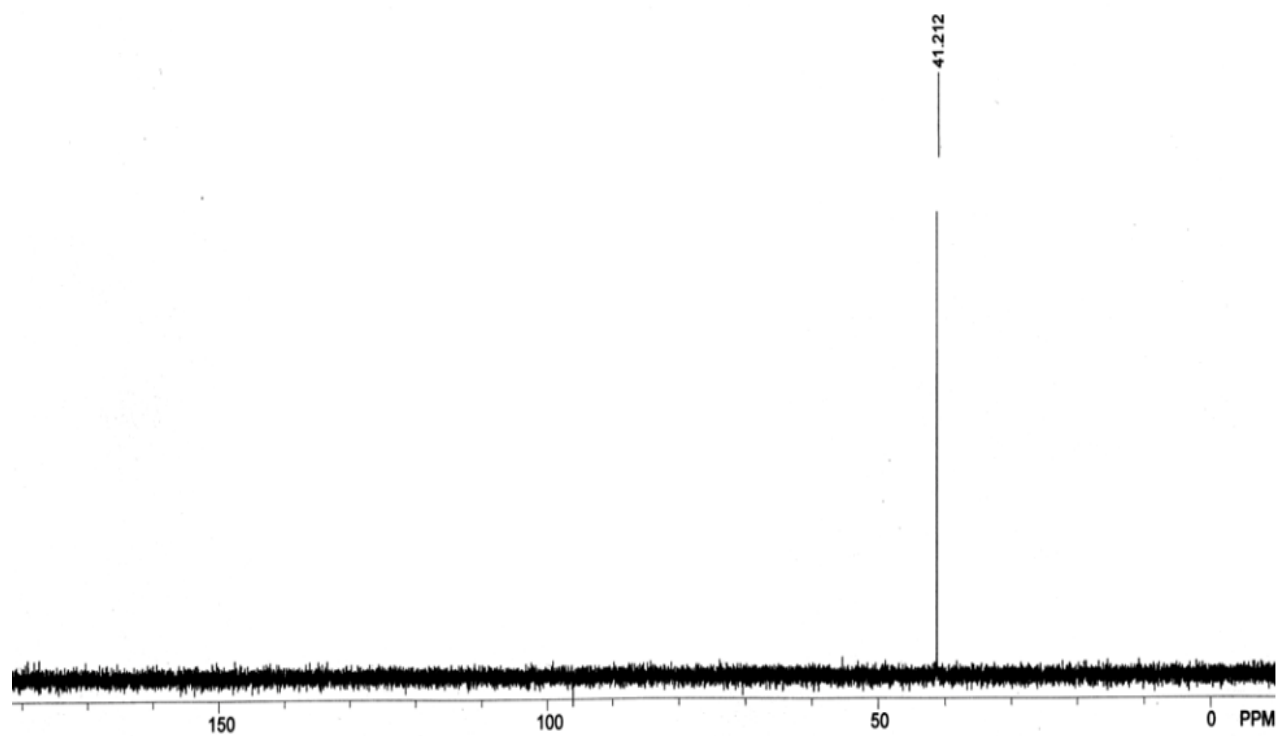

Figure S8. <sup>13</sup>C NMR (300 MHz, D<sub>2</sub>O) of 3

NMR spectra of 4a

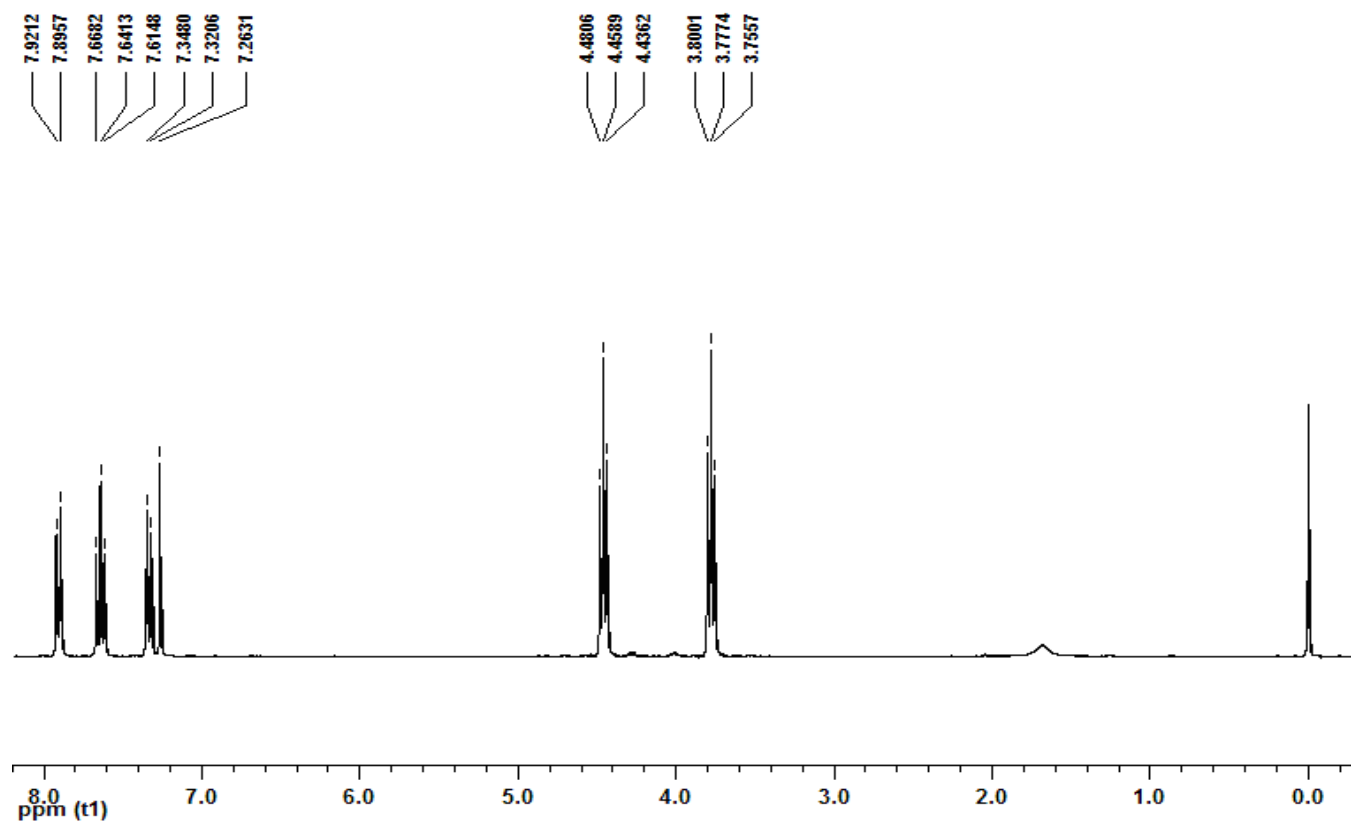

Figure S9.  $^1\text{H}$  NMR (300 MHz,  $\text{CDCl}_3$ ) of 4a

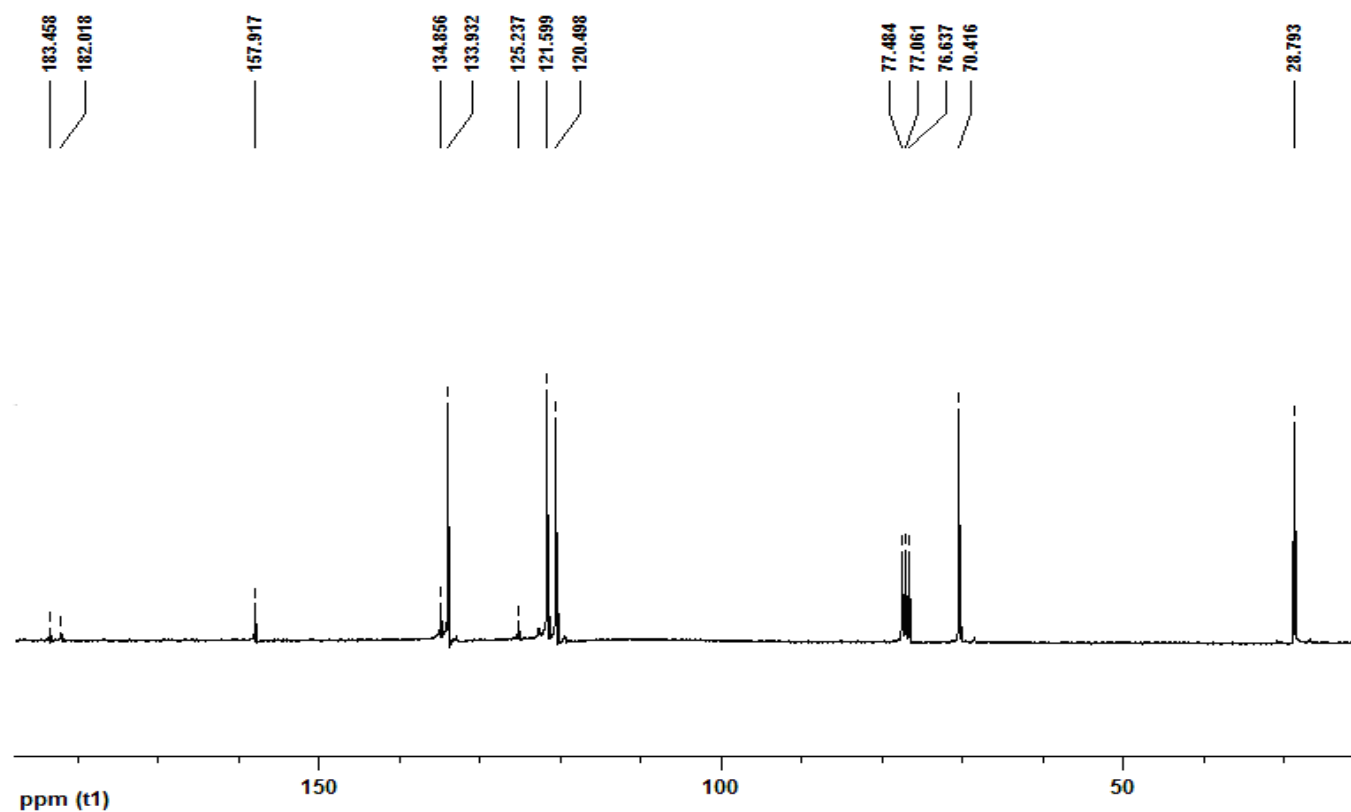

Figure S10.  $^{13}\text{C}$  NMR (300 MHz,  $\text{CDCl}_3$ ) of 4a

NMR spectra of 4b

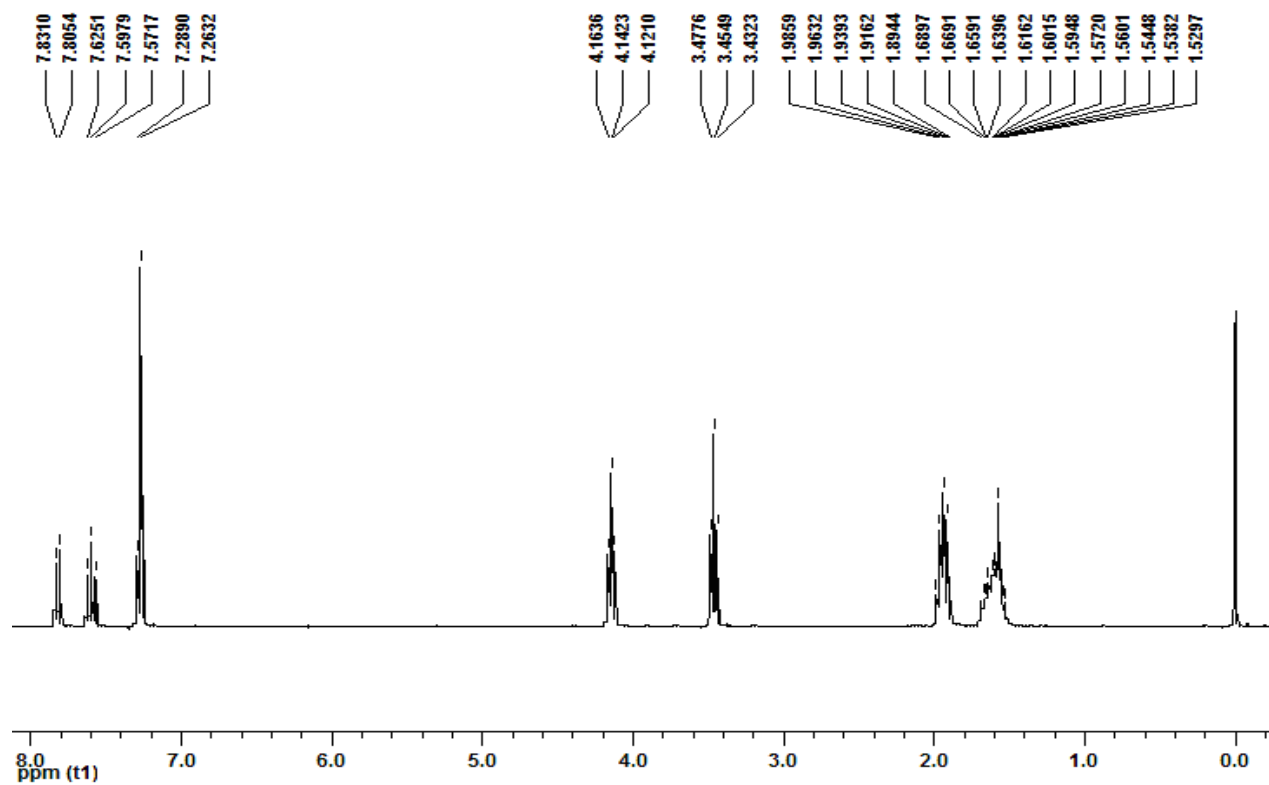

Figure S11.  $^1\text{H}$  NMR (300 MHz,  $\text{CDCl}_3$ ) of 4b

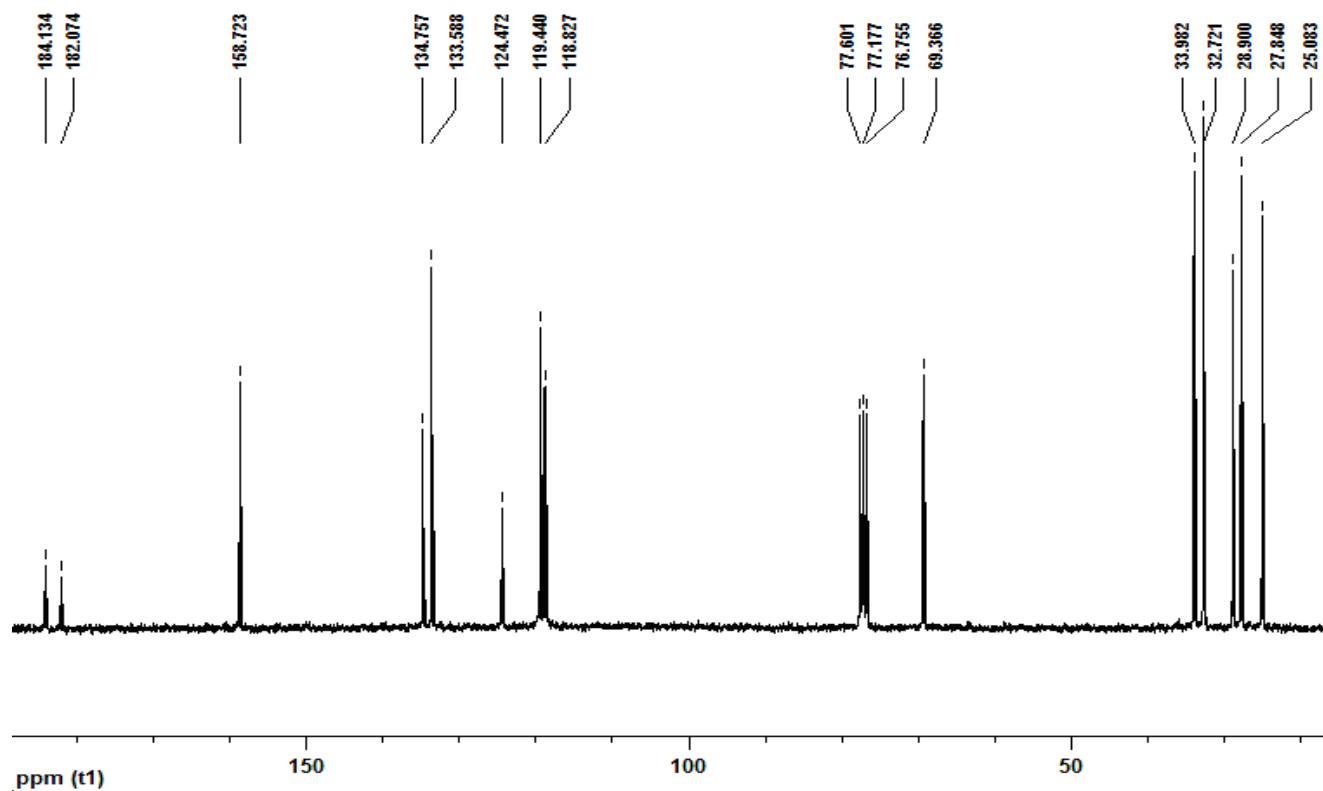

Figure S12.  $^{13}\text{C}$  NMR (300 MHz,  $\text{CDCl}_3$ ) of 4b



2. Fluorescence emission spectra and the effect of ionic strength on the DNA binding

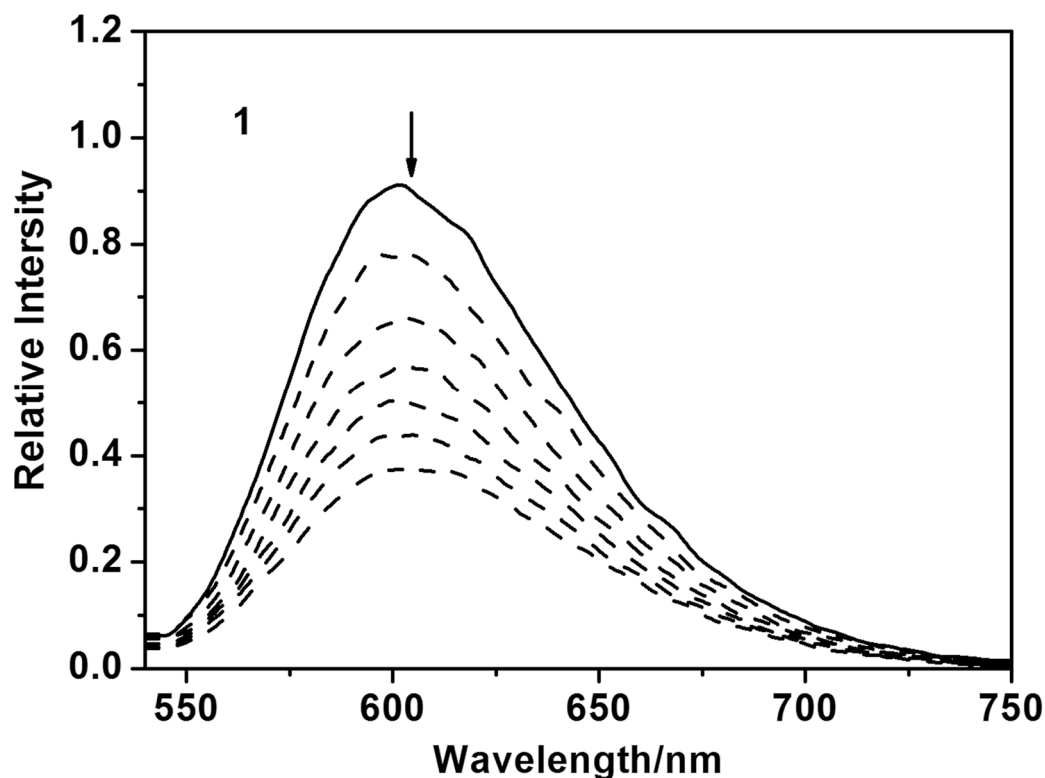

**Figure S13.** Emission spectra of EB bound to DNA in the absence (—) and presence (---) of **1** ( $r = 0, 0.05, 0.10, 0.15, 0.21, 0.26, 0.37$ ),  $r = [\text{compounds}] / [\text{CT-DNA}]$ .  $[\text{CT-DNA}] = 0.039 \text{ mM}$ .  $[\text{EB}] = 3.9 \text{ }\mu\text{M}$ .  $\lambda_{\text{ex}} = 530 \text{ nm}$ . Arrows show the intensity changes upon the addition of increasing concentration of **1**.

**Table S1.** The apparent binding constant ( $K_{\text{app}}$ ) of **1** and **2** to calf thymus DNA in the presence of various concentrations of sodium chloride in EB-DNA system in 5 mM Tris-HCl buffer (pH 7.0) at room temperature.

| $[\text{Na}^+] / \text{mM}$                     |          | 1    | 5    | 7.5  | 10   | 40   | 100  |
|-------------------------------------------------|----------|------|------|------|------|------|------|
| $K_{\text{app}} \times 10^{-7} / \text{M}^{-1}$ | <b>1</b> | 4.05 |      | 3.61 | 3.54 | 1.84 | 1.22 |
|                                                 | <b>2</b> | 5.99 | 5.68 |      | 4.68 | 2.59 | 1.63 |

### 3. pH dependence

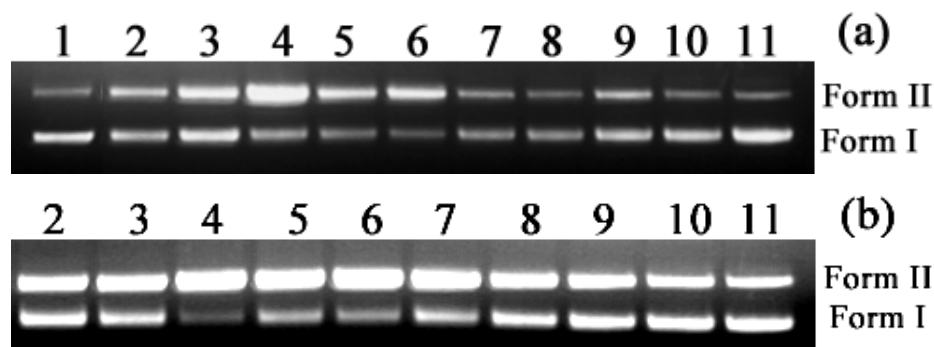

**Figure S14.** Agarose gel (1%) of pUC 19 DNA (0.025 mM bp) incubated for 16 h at 37°C with 0.033 mM (a) **1** and (b) **2** in different pH buffer (50 mM Tris-HCl / 10 mM NaCl). Lane 1, DNA control; Lanes 2 – 11, pH 6.50, 6.75, 7.00, 7.25, 7.50, 7.75, 8.00, 8.25, 8.50 and 9.00, respectively.

### 4. Concentration dependence

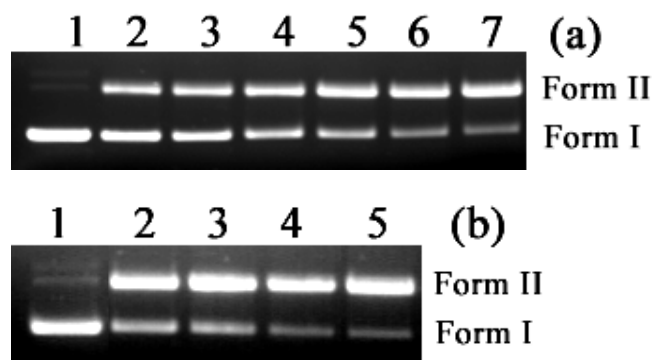

**Figure S15.** Agarose gel (1%) of pUC 19 DNA (0.025 mM bp) incubated for 16.0 h at 37 °C with different concentrations of (a) **1**, (b) **2** in pH 7.25 buffer (50 mM Tris-HCl / 10 mM NaCl).

(a) Lanes 1 - 7, 0, 0.0067, 0.0133, 0.0200, 0.027, 0.033 and 0.0400 mM **1**, respectively.

(b) Lanes 1 - 6, 0, 0.0067, 0.0133, 0.0267 and 0.0400 mM **2**, respectively.

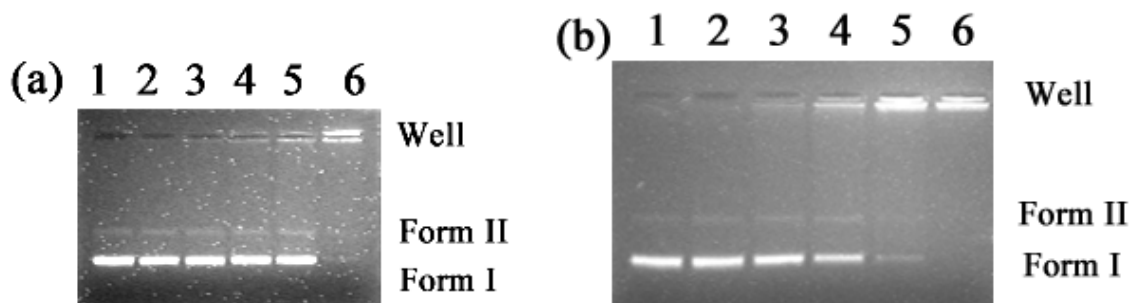

**Figure S16.** Agarose gel (1%) of pUC 19 DNA (0.025 mM bp) incubated for 1.5 h at 15°C in pH 7.25 buffer (50 mM Tris-HCl / 10 mM NaCl) with different concentrations of (a) **1**, (b) **2**.

(a) Lanes 1 - 6, 0, 0.0333, 0.0500, 0.1000, 0.1333, and 0.1667 mM **1**, respectively.

(b) Lanes 1 - 6, 0, 0.0333, 0.0500, 0.1000, 0.1333, and 0.1667 mM **2**, respectively.

### 5. DNA cleavage by 4a or 4b alone (control assays)

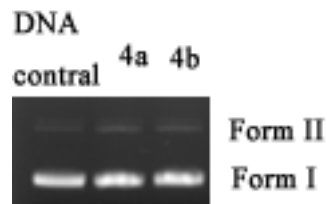

**Figure S17.** Agarose gel (1%) of pUC 19 DNA (0.025 mM bp) cleavage in the presence of **4a** and **4b** (0.0267 mM) (incubated for 16 h at 37 °C).

**Table S2.** Control assays of DNA cleavage in the presence of **4a** and **4b**.<sup>a</sup>

| added compounds | DNA %  |         |
|-----------------|--------|---------|
|                 | Form I | Form II |
| DNA control     | 96.79  | 3.21    |
| <b>4a</b>       | 95.07  | 4.93    |
| <b>4b</b>       | 95.22  | 4.78    |

<sup>a</sup> Cleavage reactions were carried out in DMF - pH 7.25 Tris-HCl buffer(v/v = 2:5) for 16 h at 37 °C.

## 6. Kinetic data

**Table S3.** Apparent initial first-order rate constants of DNA cleavage reactions at various concentrations of compounds **1** and **2**. The reactions were carried out at 37 °C in 50 mM Tris-HCl/10 mM NaCl buffer (pH 7.25).

|   | <b>2</b>         |                                | <b>1</b>         |                                |
|---|------------------|--------------------------------|------------------|--------------------------------|
|   | Concentration/mM | $k_{\text{obs}}/\text{h}^{-1}$ | Concentration/mM | $k_{\text{obs}}/\text{h}^{-1}$ |
| 1 | 0.0040           | $0.030 \pm 0.0013$             | 0.0067           | $0.040 \pm 0.0008$             |
| 2 | 0.0067           | $0.048 \pm 0.0008$             | 0.0133           | $0.052 \pm 0.0028$             |
| 3 | 0.0133           | $0.073 \pm 0.0080$             | 0.0200           | $0.053 \pm 0.0024$             |
| 4 | 0.0200           | $0.093 \pm 0.0033$             | 0.0267           | $0.065 \pm 0.0022$             |
| 5 | 0.0267           | $0.102 \pm 0.0034$             | 0.0333           | $0.071 \pm 0.0008$             |
| 6 | 0.0400           | $0.113 \pm 0.0071$             | 0.0400           | $0.075 \pm 0.0050$             |
| 7 | 0.0500           | $0.123 \pm 0.0027$             | 0.0500           | $0.077 \pm 0.0028$             |

Time course of pUC19 DNA (0.025 mM bp) cleavage promoted by **1** (0.0500mM). The reactions were carried out at 37 °C in 50 mM Tris-HCl / 10 mM NaCl buffer (pH 7.25).

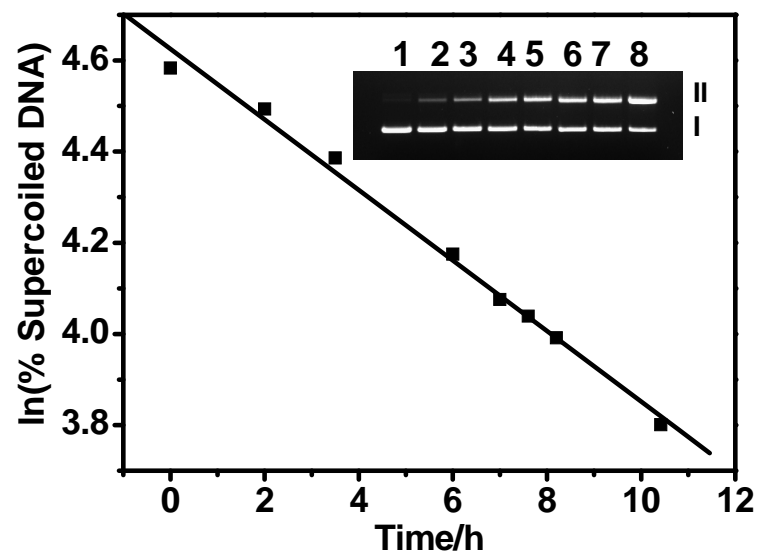

| Lane | Time/h | Ln (% Form I) | % DNA  |         |
|------|--------|---------------|--------|---------|
|      |        |               | Form I | Form II |
| 1    | 0.00   | 4.583         | 97.85  | 2.15    |
| 2    | 2.00   | 4.493         | 89.40  | 10.60   |
| 3    | 3.50   | 4.386         | 80.32  | 19.68   |
| 4    | 6.00   | 4.175         | 65.03  | 34.97   |
| 5    | 7.00   | 4.076         | 58.90  | 41.10   |
| 6    | 7.60   | 4.039         | 56.78  | 43.22   |
| 7    | 8.20   | 3.992         | 54.14  | 45.86   |
| 8    | 10.42  | 3.801         | 44.75  | 55.25   |

Time course of pUC19 DNA (0.025 mM bp) cleavage promoted by **1** (0.0400 mM). The reactions were carried out at 37 °C in 50 mM Tris-HCl / 10 mM NaCl buffer (pH 7.25).

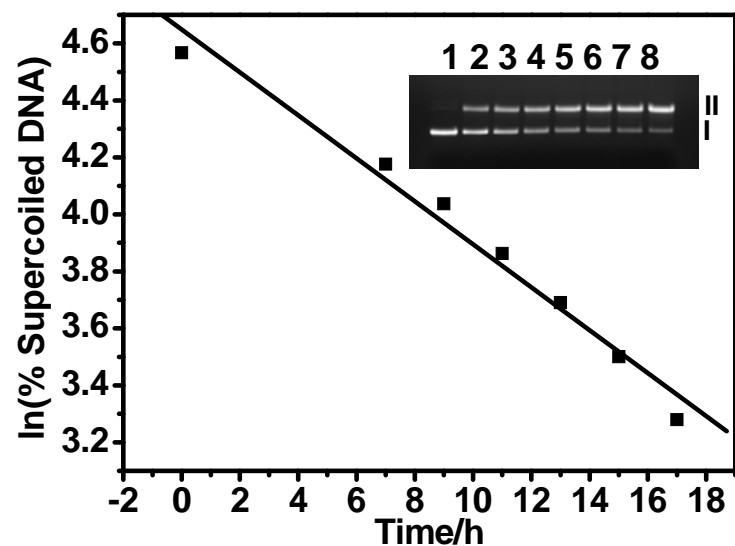

| Lane | Time/h | Ln (% Form I) | % DNA  |         |
|------|--------|---------------|--------|---------|
|      |        |               | Form I | Form II |
| 1    | 0.00   | 4.567         | 96.29  | 3.71    |
| 2    | 7.00   | 4.176         | 65.13  | 34.87   |
| 3    | 9.00   | 4.037         | 56.66  | 43.34   |
| 4    | 11.00  | 3.863         | 47.59  | 52.41   |
| 5    | 13.00  | 3.691         | 40.07  | 59.93   |
| 6    | 15.00  | 3.501         | 33.15  | 66.85   |
| 7    | 17.00  | 3.280         | 26.57  | 73.43   |
| 8    | 19.00  | 2.945         | 19.01  | 80.99   |

Time course of pUC19 DNA (0.025 mM bp) cleavage promoted by **1** (0.0333 mM). The reactions were carried out at 37 °C in 50 mM Tris-HCl / 10 mM NaCl buffer (pH 7.25).

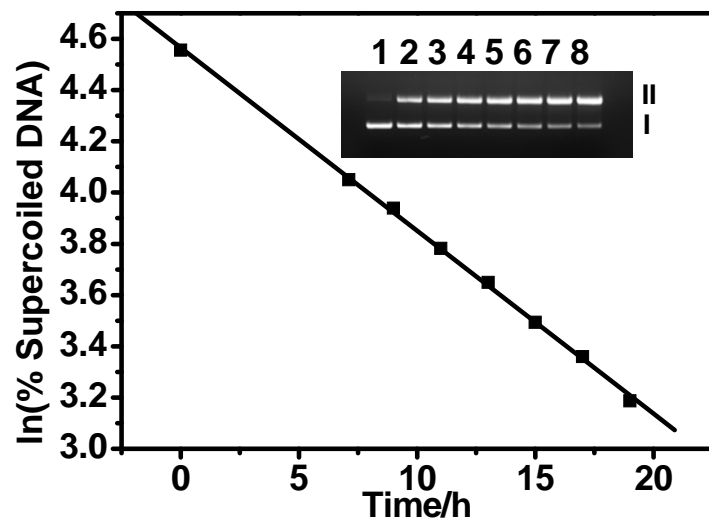

| Lane | Time/h | Ln (% Form I) | % DNA  |         |
|------|--------|---------------|--------|---------|
|      |        |               | Form I | Form II |
| 1    | 0.00   | 4.556         | 95.19  | 4.81    |
| 2    | 7.12   | 4.050         | 57.41  | 42.59   |
| 3    | 9.00   | 3.940         | 51.40  | 48.60   |
| 4    | 11.00  | 3.782         | 43.93  | 56.07   |
| 5    | 13.00  | 3.649         | 38.44  | 61.56   |
| 6    | 15.00  | 3.493         | 32.89  | 67.11   |
| 7    | 17.00  | 3.360         | 28.78  | 71.22   |
| 8    | 19.00  | 3.187         | 24.22  | 75.78   |

Time course of pUC19 DNA (0.025 mM bp) cleavage promoted by **1** (0.0267 mM). The reactions were carried out at 37 °C in 50 mM Tris-HCl / 10 mM NaCl buffer (pH 7.25).

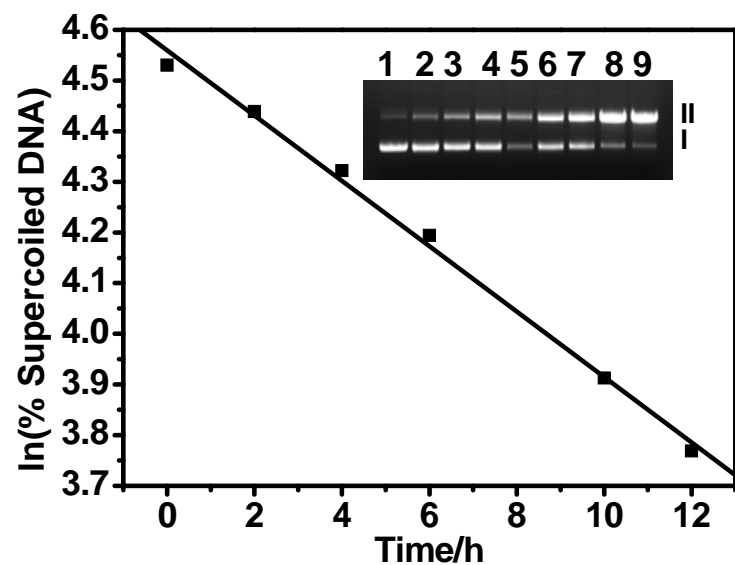

| Lane | Time/h | Ln (% Form I) | % DNA  |         |
|------|--------|---------------|--------|---------|
|      |        |               | Form I | Form II |
| 1    | 0.00   | 4.530         | 92.76  | 7.24    |
| 2    | 2.00   | 4.439         | 84.66  | 15.34   |
| 3    | 4.00   | 4.322         | 75.33  | 24.67   |
| 4    | 6.00   | 4.194         | 66.30  | 33.70   |
| 5    | 8.00   | 3.749         | 42.47  | 57.53   |
| 6    | 10.00  | 3.913         | 50.03  | 49.97   |
| 7    | 12.00  | 3.769         | 43.33  | 56.67   |
| 8    | 21.28  | 2.909         | 18.34  | 81.66   |
| 9    | 24.48  | 2.334         | 10.32  | 89.68   |



Time course of pUC19 DNA (0.025 mM bp) cleavage promoted by **1** (0.0200 mM). The reactions were carried out at 37 °C in 50 mM Tris-HCl / 10 mM NaCl buffer (pH 7.25).

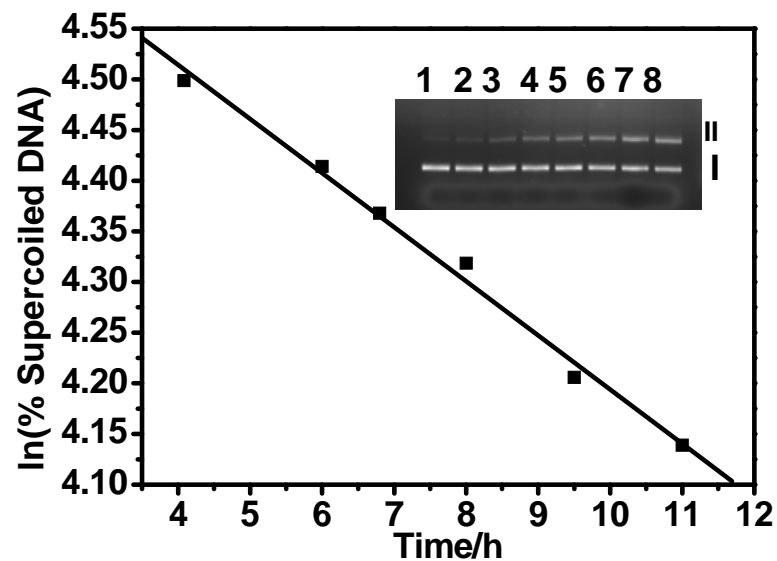

| Lane | Time/h | Ln (% Form I) | % DNA  |         |
|------|--------|---------------|--------|---------|
|      |        |               | Form I | Form II |
| 1    | 0.00   | 4.586         | 98.07  | 1.93    |
| 2    | 2.00   | 4.562         | 95.77  | 4.23    |
| 3    | 4.08   | 4.499         | 89.91  | 10.09   |
| 4    | 6.00   | 4.414         | 82.60  | 17.40   |
| 5    | 6.80   | 4.368         | 78.88  | 21.12   |
| 6    | 8.00   | 4.318         | 75.07  | 24.93   |
| 7    | 9.50   | 4.206         | 67.08  | 32.92   |
| 8    | 11.00  | 4.139         | 62.74  | 37.26   |

Time course of pUC19 DNA (0.025 mM bp) cleavage promoted by 1 (0.0133 mM). The reactions were carried out at 37 °C in 50 mM Tris-HCl / 10 mM NaCl buffer (pH 7.25).

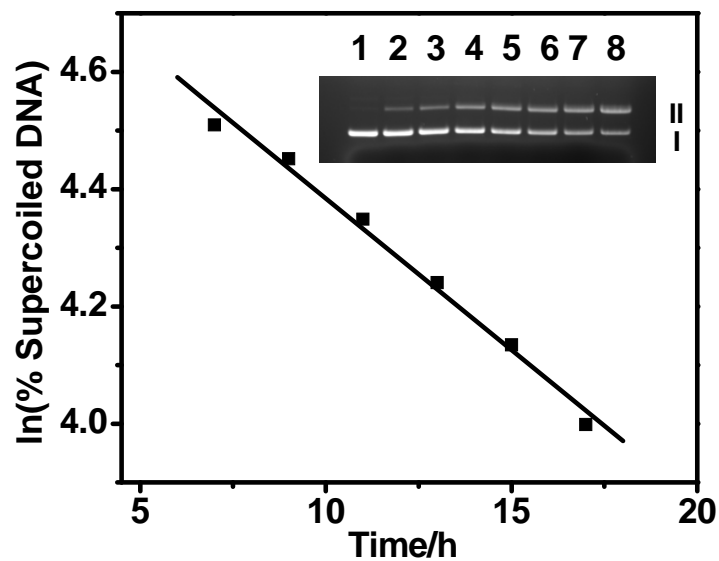

| Lane | Time/h | Ln (% Form I) | % DNA  |         |
|------|--------|---------------|--------|---------|
|      |        |               | Form I | Form II |
| 1    | 0.00   | 4.597         | 99.17  | 0.83    |
| 2    | 7.00   | 4.510         | 90.90  | 9.10    |
| 3    | 9.00   | 4.452         | 85.81  | 14.19   |
| 4    | 11.00  | 4.349         | 77.40  | 22.60   |
| 5    | 13.00  | 4.241         | 69.46  | 30.54   |
| 6    | 15.00  | 4.135         | 62.46  | 37.54   |
| 7    | 17.00  | 3.999         | 54.53  | 45.47   |
| 8    | 19.00  | 3.798         | 44.62  | 55.38   |

Time course of pUC19 DNA (0.025 mM bp) cleavage promoted by 1 (0.0067 mM). The reactions were carried out at 37 °C in 50 mM Tris-HCl / 10 mM NaCl buffer (pH 7.25).

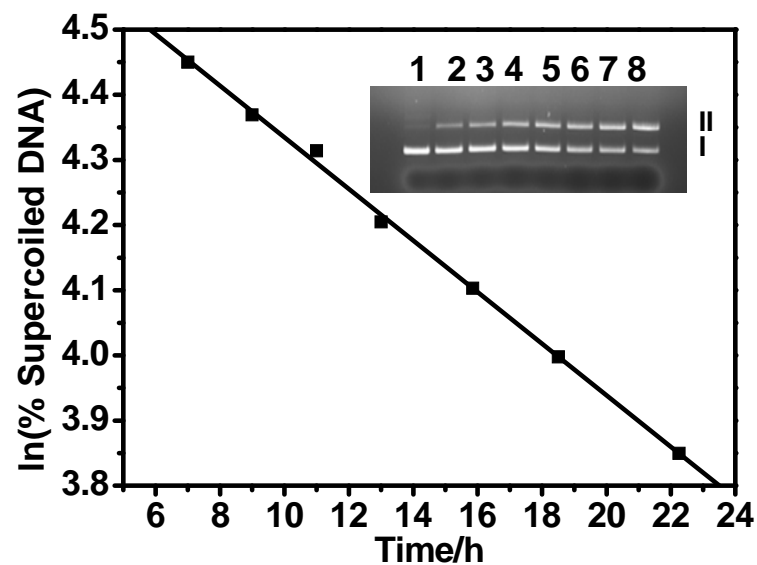

| Lane | Time/h | Ln (% Form I) | % DNA  |         |
|------|--------|---------------|--------|---------|
|      |        |               | Form I | Form II |
| 1    | 0      | 4.587         | 98.24  | 1.76    |
| 2    | 7      | 4.450         | 85.65  | 14.35   |
| 3    | 9      | 4.369         | 78.98  | 21.02   |
| 4    | 11     | 4.314         | 74.74  | 25.26   |
| 5    | 13     | 4.205         | 67.01  | 32.99   |
| 6    | 15.85  | 4.103         | 60.53  | 39.47   |
| 7    | 18.51  | 3.998         | 54.47  | 45.53   |
| 8    | 22.25  | 3.850         | 46.98  | 53.02   |

Time course of pUC19 DNA (0.025 mM bp) cleavage promoted by **2** (0.0500 mM). The reactions were carried out at 37 °C in 50 mM Tris-HCl / 10 mM NaCl buffer (pH 7.25).

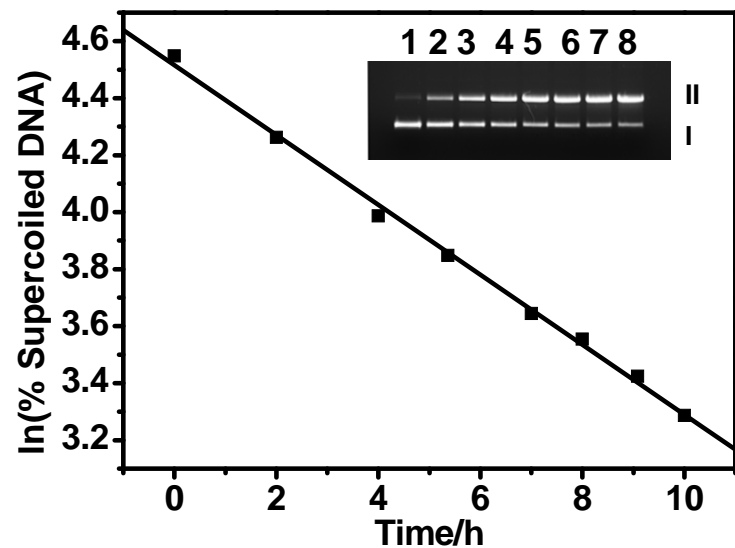

| Lane | Time/h | Ln (% Form I) | % DNA  |         |
|------|--------|---------------|--------|---------|
|      |        |               | Form I | Form II |
| 1    | 0.00   | 4.549         | 94.50  | 5.50    |
| 2    | 2.00   | 4.262         | 70.98  | 29.02   |
| 3    | 4.00   | 3.987         | 53.90  | 46.10   |
| 4    | 5.37   | 3.849         | 46.94  | 53.06   |
| 5    | 7.00   | 3.644         | 38.25  | 61.75   |
| 6    | 8.00   | 3.554         | 34.97  | 65.03   |
| 7    | 9.08   | 3.424         | 30.70  | 69.30   |
| 8    | 10.00  | 3.287         | 26.75  | 73.25   |

Time course of pUC19 DNA (0.025 mM bp) cleavage promoted by **2** (0.0400 mM). The reactions were carried out at 37 °C in 50 mM Tris-HCl / 10 mM NaCl buffer (pH 7.25).

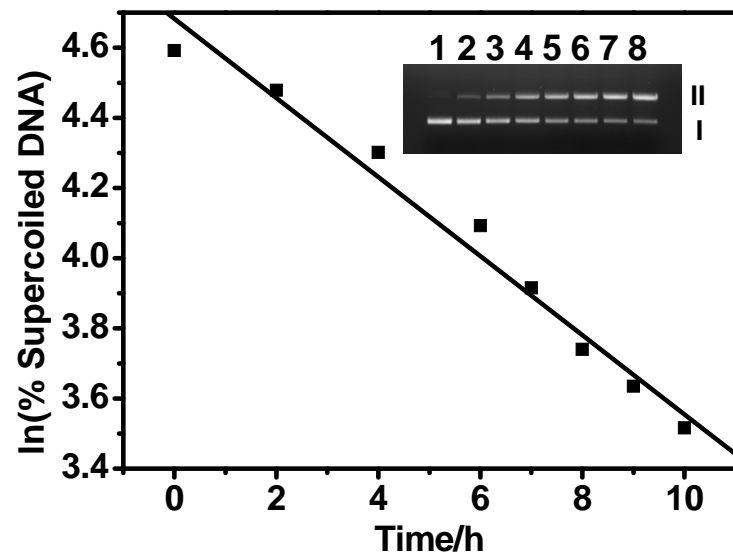

| Lane | Time/h | Ln (% Form I) | % DNA  |         |
|------|--------|---------------|--------|---------|
|      |        |               | Form I | Form II |
| 1    | 0.00   | 4.592         | 98.69  | 1.31    |
| 2    | 2.00   | 4.479         | 88.16  | 11.84   |
| 3    | 4.00   | 4.302         | 73.83  | 26.17   |
| 4    | 5.50   | 4.092         | 59.88  | 40.12   |
| 5    | 7.00   | 3.916         | 50.17  | 49.83   |
| 6    | 8.00   | 3.740         | 42.10  | 57.90   |
| 7    | 9.00   | 3.635         | 37.91  | 62.09   |
| 8    | 10.00  | 3.516         | 33.66  | 66.34   |

Time course of pUC19 DNA (0.025 mM bp) cleavage promoted by **2** (0.0267 mM). The reactions were carried out at 37 °C in 50 mM Tris-HCl / 10 mM NaCl buffer (pH 7.25).

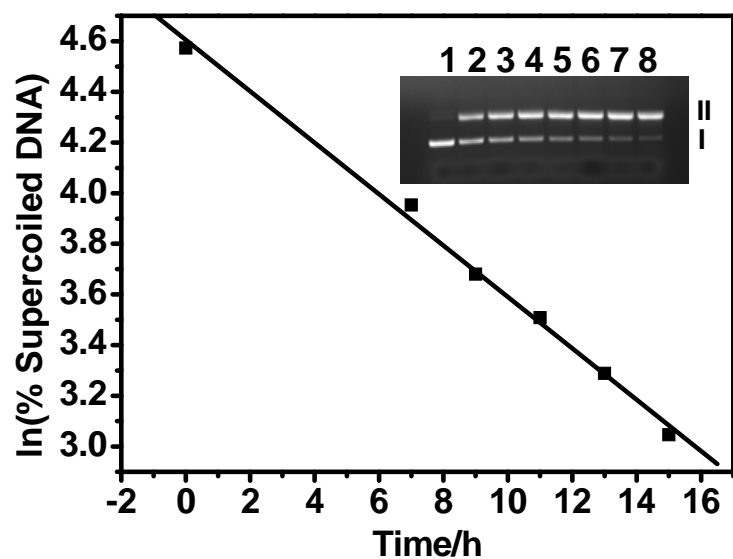

| Lane | Time/h | Ln (% Form I) | % DNA  |         |
|------|--------|---------------|--------|---------|
|      |        |               | Form I | Form II |
| 1    | 0.00   | 4.573         | 96.85  | 3.15    |
| 2    | 7.00   | 3.953         | 52.12  | 47.88   |
| 3    | 9.00   | 3.680         | 39.65  | 60.35   |
| 4    | 11.00  | 3.509         | 33.40  | 66.60   |
| 5    | 13.00  | 3.289         | 26.82  | 73.18   |
| 6    | 15.00  | 3.046         | 21.04  | 78.96   |
| 7    | 17.00  | 2.669         | 14.43  | 85.57   |
| 8    | 19.00  | 2.286         | 9.83   | 90.17   |

Time course of pUC19 DNA (0.025 mM bp) cleavage promoted by **2** (0.0200 mM). The reactions were carried out at 37 °C in 50 mM Tris-HCl / 10 mM NaCl buffer (pH 7.25).

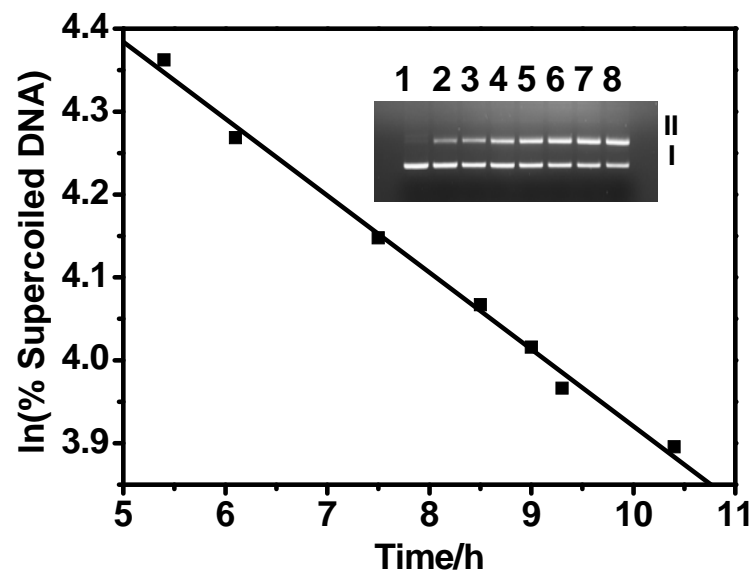

| Lane | Time/h | Ln (% Form I) | % DNA  |         |
|------|--------|---------------|--------|---------|
|      |        |               | Form I | Form II |
| 1    | 0.00   | 4.588         | 98.32  | 1.68    |
| 2    | 5.40   | 4.362         | 78.43  | 21.57   |
| 3    | 6.10   | 4.268         | 71.40  | 28.60   |
| 4    | 7.50   | 4.148         | 63.29  | 36.71   |
| 5    | 8.50   | 4.067         | 58.39  | 41.61   |
| 6    | 9.00   | 4.016         | 55.48  | 44.52   |
| 7    | 9.30   | 3.966         | 52.80  | 47.20   |
| 8    | 10.40  | 3.896         | 49.20  | 50.80   |

Time course of pUC19 DNA (0.025 mM bp) cleavage promoted by **2** (0.0133 mM). The reactions were carried out at 37 °C in 50 mM Tris-HCl / 10 mM NaCl buffer (pH 7.25).

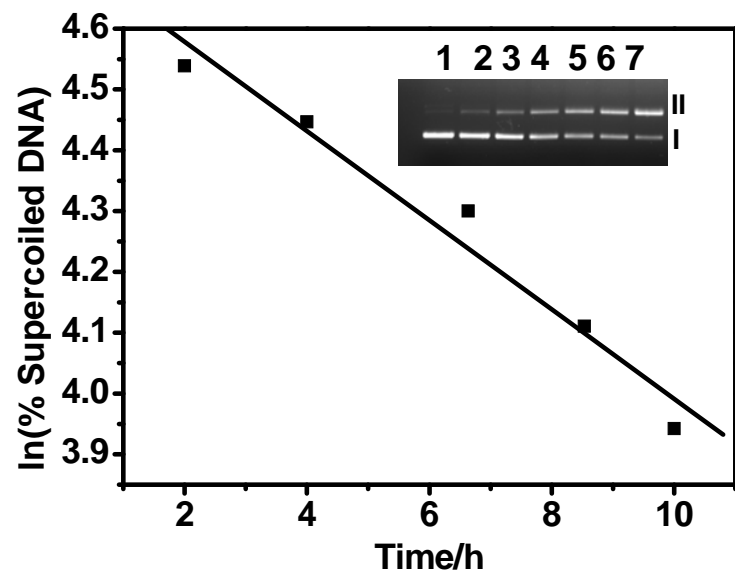

| Lane | Time /h | Ln (% Form I) | % DNA  |         |
|------|---------|---------------|--------|---------|
|      |         |               | Form I | Form II |
| 1    | 0.00    | 4.595         | 99.01  | 0.99    |
| 2    | 2.00    | 4.539         | 93.58  | 6.42    |
| 3    | 4.00    | 4.447         | 85.36  | 14.64   |
| 4    | 6.63    | 4.300         | 73.71  | 26.29   |
| 5    | 8.53    | 4.111         | 61.00  | 39.00   |
| 6    | 10.00   | 3.942         | 51.53  | 48.47   |
| 7    | 12.00   | 3.492         | 32.84  | 67.16   |



Time course of pUC19 DNA (0.025 mM bp) cleavage promoted by **2** (0.0067 mM). The reactions were carried out at 37 °C in 50 mM Tris-HCl / 10 mM NaCl buffer (pH 7.25).

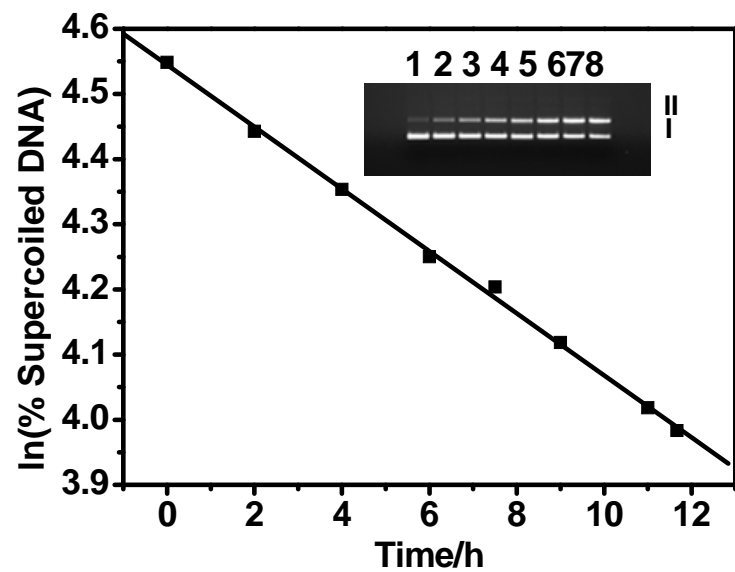

| Lane | Time/h | Ln (% Form I) | % DNA  |         |
|------|--------|---------------|--------|---------|
|      |        |               | Form I | Form II |
| 1    | 0.00   | 4.549         | 94.50  | 5.50    |
| 2    | 2.00   | 4.443         | 85.02  | 14.98   |
| 3    | 4.00   | 4.354         | 77.75  | 22.25   |
| 4    | 6.00   | 4.250         | 70.11  | 29.89   |
| 5    | 7.50   | 4.204         | 66.94  | 33.06   |
| 6    | 9.00   | 4.118         | 61.46  | 38.54   |
| 7    | 11.00  | 4.018         | 55.61  | 44.39   |
| 8    | 11.67  | 3.983         | 53.70  | 46.30   |

Time course of pUC19 DNA (0.025 mM bp) cleavage promoted by **2** (0.0040 mM). The reactions were carried out at 37 °C in 50 mM Tris-HCl / 10 mM NaCl buffer (pH 7.25).

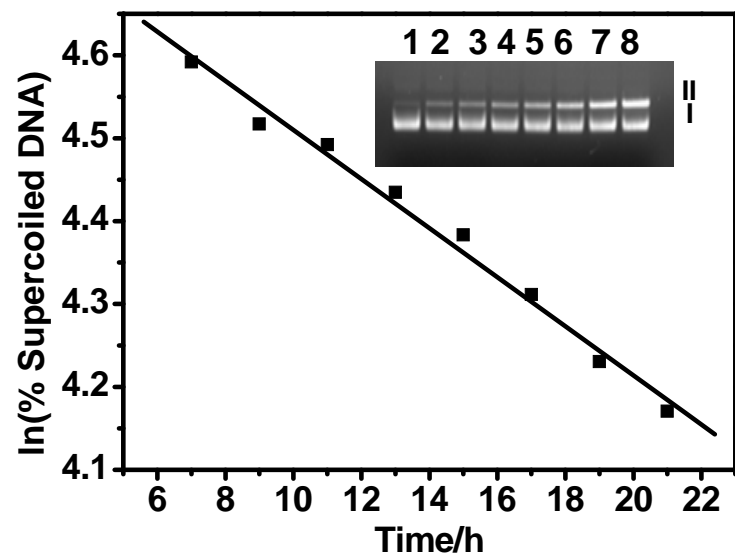

| Lane | Time/h | Ln (% Form I) | % DNA  |         |
|------|--------|---------------|--------|---------|
|      |        |               | Form I | Form II |
| 1    | 0.00   | 4.588         | 98.31  | 1.69    |
| 2    | 7.00   | 4.592         | 98.69  | 1.31    |
| 3    | 9.00   | 4.517         | 91.59  | 8.41    |
| 4    | 11.00  | 4.492         | 89.32  | 10.68   |
| 5    | 13.00  | 4.435         | 84.33  | 15.67   |
| 6    | 15.00  | 4.384         | 80.12  | 19.88   |
| 7    | 17.00  | 4.311         | 74.55  | 25.45   |
| 8    | 19.00  | 4.231         | 68.77  | 31.23   |
| 9    | 21.00  | 4.171         | 64.77  | 35.23   |

**Table S4.** Apparent initial first-order rate constants of DNA cleavage reactions at various concentrations of compounds **3**. The reactions were carried out at 37 °C in 50 mM Tris-HCl/10 mM NaCl buffer (pH 7.25).

| Compound 5 |                  |                                |
|------------|------------------|--------------------------------|
|            | Concentration/mM | $k_{\text{obs}}/\text{h}^{-1}$ |
| 1          | 0.05             | $0.0015 \pm 3.4152\text{E-}5$  |
| 2          | 0.1              | $0.0016 \pm 2.5787\text{E-}5$  |
| 3          | 0.15             | $0.0018 \pm 8.2484\text{E-}5$  |
| 4          | 0.2              | $0.0020 \pm 5.8992\text{E-}5$  |
| 5          | 0.25             | $0.0021 \pm 7.7566\text{E-}5$  |

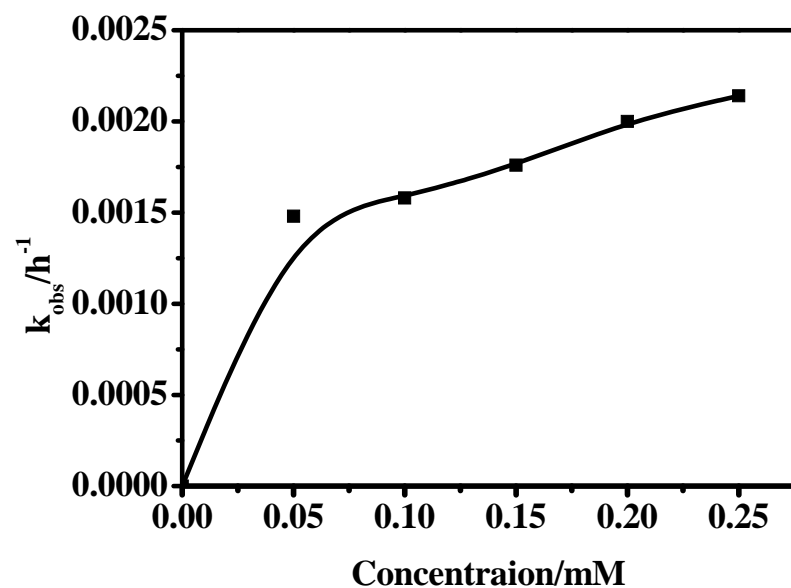

**Figure S18.** Kinetics plot of  $k_{\text{obs}}$  vs various concentrations of **3**.

Time course of pUC19 DNA (0.025 mM bp) cleavage promoted by **3** (0.050 mM). The reactions were carried out at 37 °C in 50 mM Tris-HCl/10 mM NaCl buffer (pH 7.25).

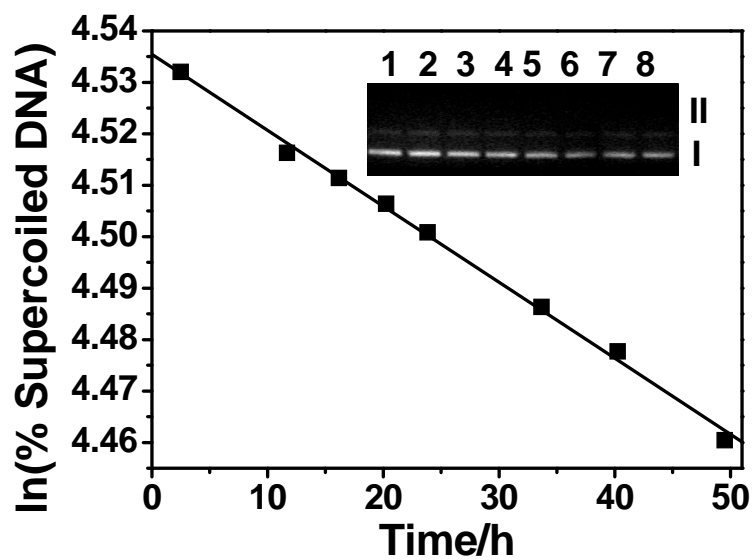

| Lane | Time/h | Ln (% Form I) | % DNA  |         |
|------|--------|---------------|--------|---------|
|      |        |               | Form I | Form II |
| 1    | 2.50   | 4.532         | 92.95  | 7.05    |
| 2    | 11.67  | 4.516         | 91.50  | 8.50    |
| 3    | 16.17  | 4.511         | 91.05  | 8.95    |
| 4    | 20.25  | 4.506         | 90.60  | 9.40    |
| 5    | 23.83  | 4.501         | 90.09  | 9.91    |
| 6    | 33.67  | 4.486         | 88.80  | 11.20   |
| 7    | 40.25  | 4.478         | 88.03  | 11.97   |
| 8    | 49.50  | 4.460         | 86.52  | 13.48   |

Time course of pUC19 DNA (0.025 mM bp) cleavage promoted by **3** (0.100 mM). The reactions were carried out at 37 °C in 50 mM Tris-HCl/10 mM NaCl buffer (pH 7.25).

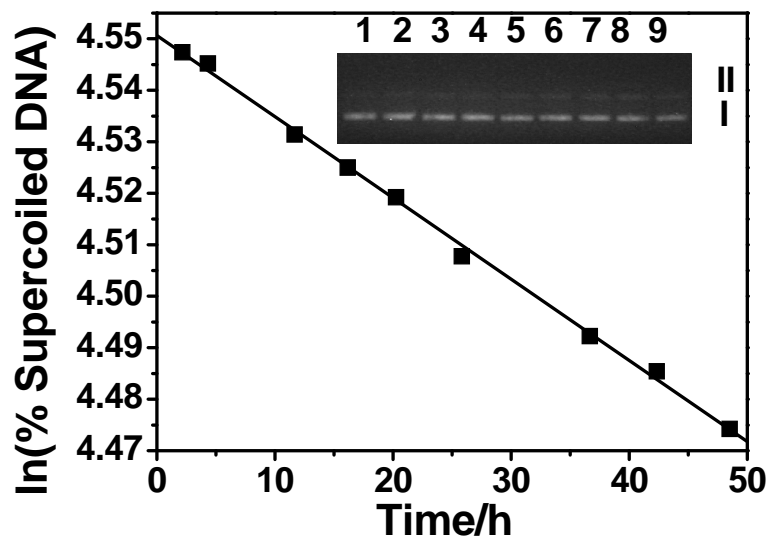

| Lane | Time/h | Ln (% Form I) | % DNA  |         |
|------|--------|---------------|--------|---------|
|      |        |               | Form I | Form II |
| 1    | 2.17   | 4.547         | 94.38  | 5.62    |
| 2    | 4.33   | 4.545         | 94.18  | 5.82    |
| 3    | 11.67  | 4.531         | 92.89  | 7.11    |
| 4    | 16.17  | 4.525         | 92.30  | 7.70    |
| 5    | 20.25  | 4.519         | 91.76  | 8.24    |
| 6    | 25.83  | 4.508         | 90.72  | 9.28    |
| 7    | 36.67  | 4.492         | 89.32  | 10.68   |
| 8    | 42.33  | 4.485         | 88.72  | 11.28   |
| 9    | 48.50  | 4.474         | 87.73  | 12.27   |

Time course of pUC19 DNA (0.025 mM bp) cleavage promoted by **3** (0.150 mM). The reactions were carried out at 37 °C in 50 mM Tris-HCl/10 mM NaCl buffer (pH 7.25).

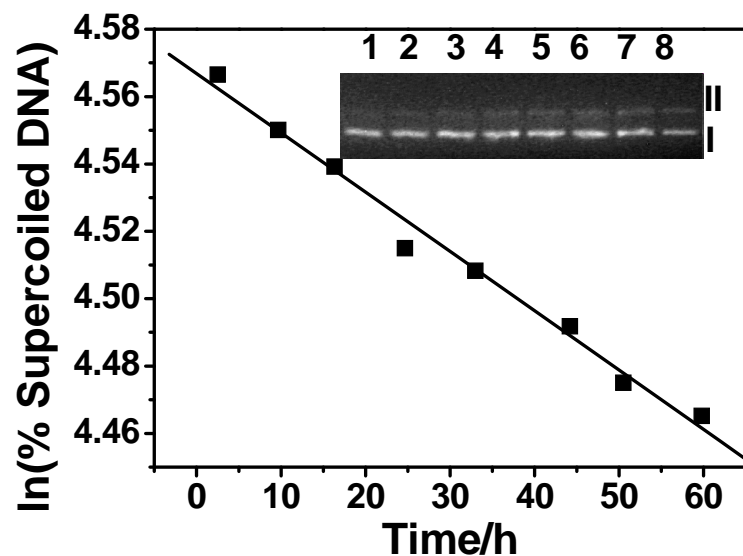

| Lane | Time/h | Ln (% Form I) | % DNA  |         |
|------|--------|---------------|--------|---------|
|      |        |               | Form I | Form II |
| 1    | 2.50   | 4.567         | 96.21  | 3.79    |
| 2    | 9.67   | 4.550         | 94.64  | 5.36    |
| 3    | 16.33  | 4.539         | 93.62  | 6.38    |
| 4    | 24.67  | 4.515         | 91.37  | 8.63    |
| 5    | 33.00  | 4.508         | 90.77  | 9.23    |
| 6    | 44.17  | 4.492         | 89.28  | 10.72   |
| 7    | 50.50  | 4.475         | 87.80  | 12.20   |
| 8    | 59.80  | 4.465         | 86.94  | 13.06   |

Time course of pUC19 DNA (0.025 mM bp) cleavage promoted by **3** (0.200 mM). The reactions were carried out at 37 °C in 50 mM Tris-HCl/10 mM NaCl buffer (pH 7.25).

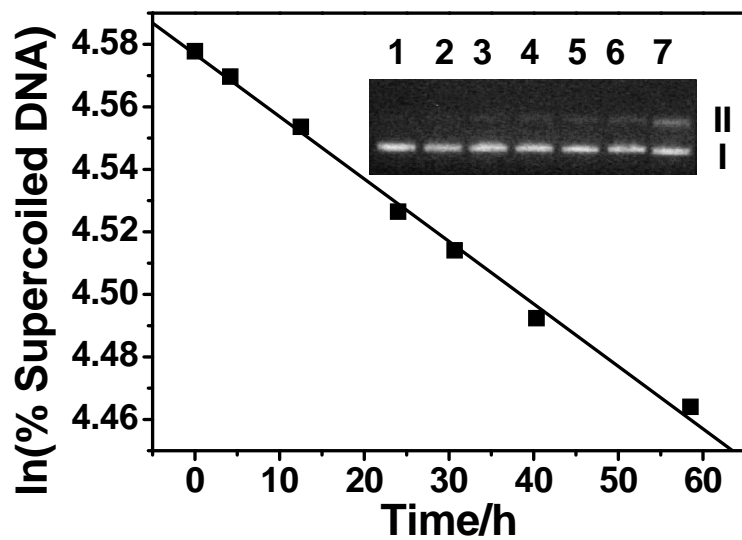

| Lane | Time/h | Ln (% Form I) | % DNA  |         |
|------|--------|---------------|--------|---------|
|      |        |               | Form I | Form II |
| 1    | 0      | 4.578         | 97.30  | 2.70    |
| 2    | 4.17   | 4.570         | 96.51  | 3.49    |
| 3    | 12.50  | 4.554         | 94.97  | 5.03    |
| 4    | 24.00  | 4.526         | 92.43  | 7.57    |
| 5    | 30.67  | 4.514         | 91.29  | 8.71    |
| 6    | 40.33  | 4.492         | 89.33  | 10.67   |
| 7    | 58.50  | 4.464         | 86.84  | 13.16   |

Time course of pUC19 DNA (0.025 mM bp) cleavage promoted by **3** (0.250 mM). The reactions were carried out at 37 °C in 50 mM Tris-HCl/10 mM NaCl buffer (pH 7.25).

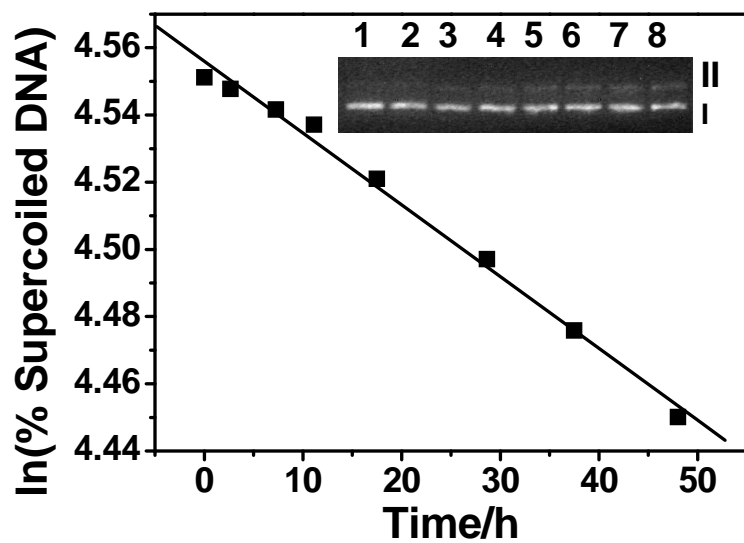

| Lane | Time/h | Ln (% Form I) | % DNA  |         |
|------|--------|---------------|--------|---------|
|      |        |               | Form I | Form II |
| 1    | 0      | 4.551         | 94.75  | 5.25    |
| 2    | 2.67   | 4.548         | 94.42  | 5.58    |
| 3    | 7.25   | 4.542         | 93.84  | 6.16    |
| 4    | 11.13  | 4.537         | 93.42  | 6.58    |
| 5    | 17.50  | 4.521         | 91.92  | 8.08    |
| 6    | 28.67  | 4.497         | 89.76  | 10.24   |
| 7    | 37.50  | 4.476         | 87.87  | 12.13   |
| 8    | 48.00  | 4.450         | 85.64  | 14.36   |



### 7. Radical scavengers' and EDTA' inhibition

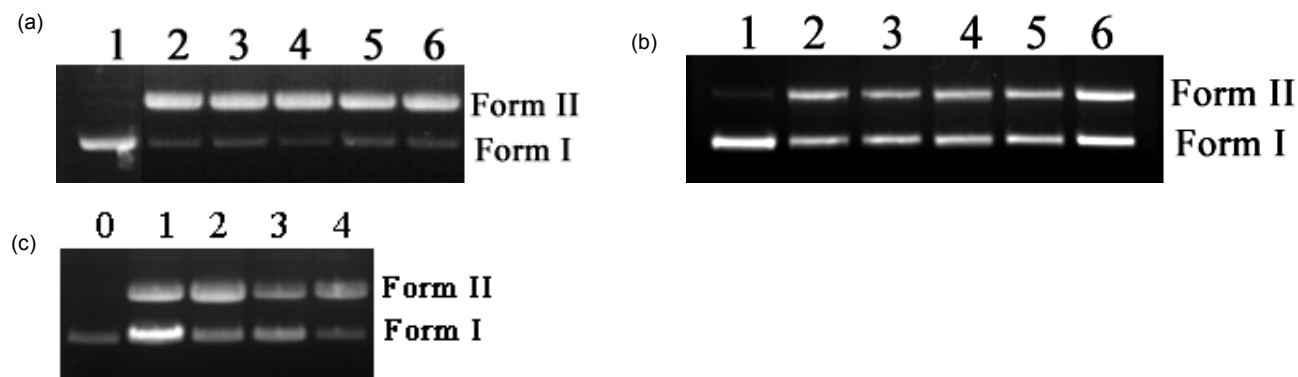

**Figure S19.** Agarose gel (1%) of pUC19 plasmid DNA (0.025 mM bp) cleaved by (a) **2** (0.0400 mM) and (b) **1** (0.0180 mM) in the presence of standard radical scavengers incubated for 18 h at 37 °C in pH 7.25 buffer (50 mM Tris–HCl / 10 mM NaCl). Lane 1, DNA control; lane 2, no scavengers; lanes 3 – 6, in the presence of NaN<sub>3</sub>, DMSO, *t*-BuOH and KI, respectively;

(c) **2** (0.040 mM) and **1** (0.021 mM) in the presence of EDTA (10 mM) incubated for 10 h at 37 °C in pH 7.25 buffer (50 mM Tris–HCl / 10 mM NaCl). Lane 0, DNA control; lane 1, **1** without EDTA; lanes 2, **2** without EDTA; lane 3, **1** in the presence EDTA; lane 4, **2** in the presence EDTA.

**Table S5.** DNA cleavage promoted by (a) **2** (0.0400 mM) and (b) **1** (0.0180 mM) in the presence of standard radical scavengers.

|                           | % DNA    |         |          |         |
|---------------------------|----------|---------|----------|---------|
|                           | <b>2</b> |         | <b>1</b> |         |
|                           | Form I   | Form II | Form I   | Form II |
| DNA control               | 98.58    | 1.42    | 96.12    | 3.88    |
| <b>1</b> or <b>2</b> only | 14.33    | 85.67   | 53.87    | 46.13   |
| NaN <sub>3</sub>          | 8.16     | 91.84   | 62.71    | 37.29   |
| DMSO                      | 18.72    | 81.28   | 58.29    | 41.71   |
| <i>t</i> -BuOH            | 16.36    | 83.64   | 58.76    | 41.24   |
| KI                        | 11.58    | 88.42   | 56.51    | 43.49   |

**Table S6.** DNA cleavage promoted by (a) **2** (0.040 mM) and (b) **1** (0.021 mM) in the presence of 10 mM EDTA.

|                           | % DNA    |         |          |         |
|---------------------------|----------|---------|----------|---------|
|                           | <b>2</b> |         | <b>1</b> |         |
|                           | Form I   | Form II | Form I   | Form II |
| DNA control               | 95.63    | 4.37    | 95.63    | 4.37    |
| <b>1</b> or <b>2</b> only | 34.35    | 65.65   | 64.89    | 35.11   |
| EDTA                      | 29.78    | 70.22   | 60.50    | 39.50   |

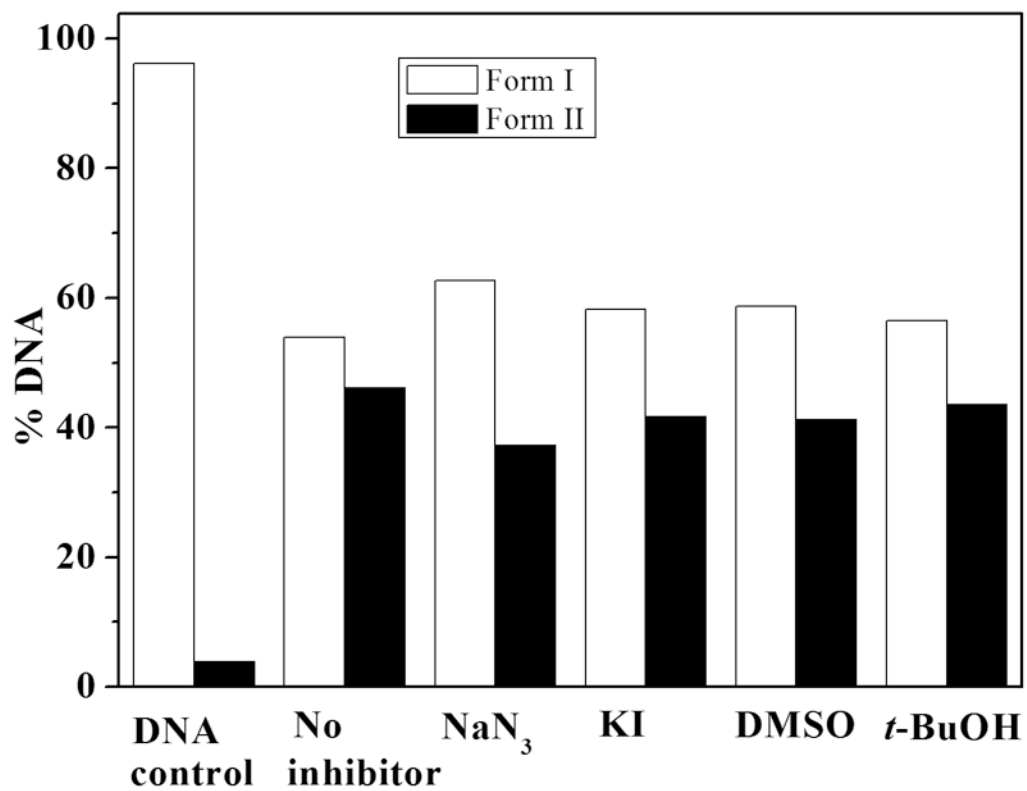

**Figure S20.** Histogram representing of pUC19 plasmid DNA (0.025 mM bp) cleaved by **1** (0.0180 mM) in the presence of standard radical scavengers incubated for 18 h at 37 °C in pH 7.25 buffer (50 mM Tris-HCl / 10 mM NaCl).

## 8. ESI-MS spectra of ApA

(a)

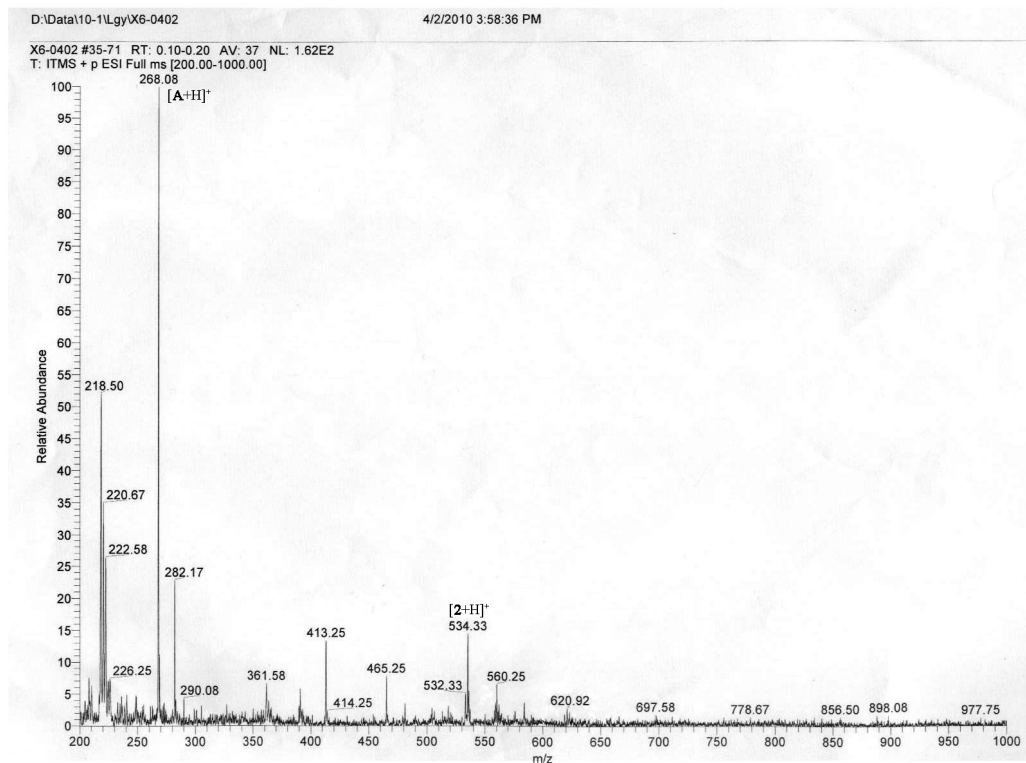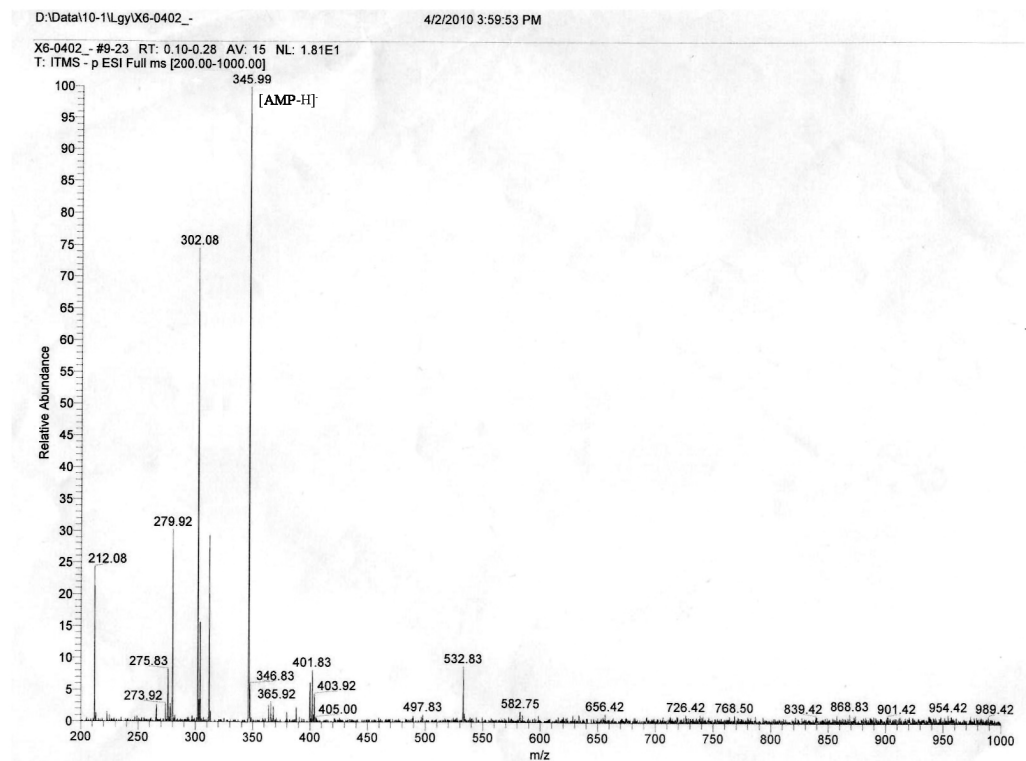

(b)

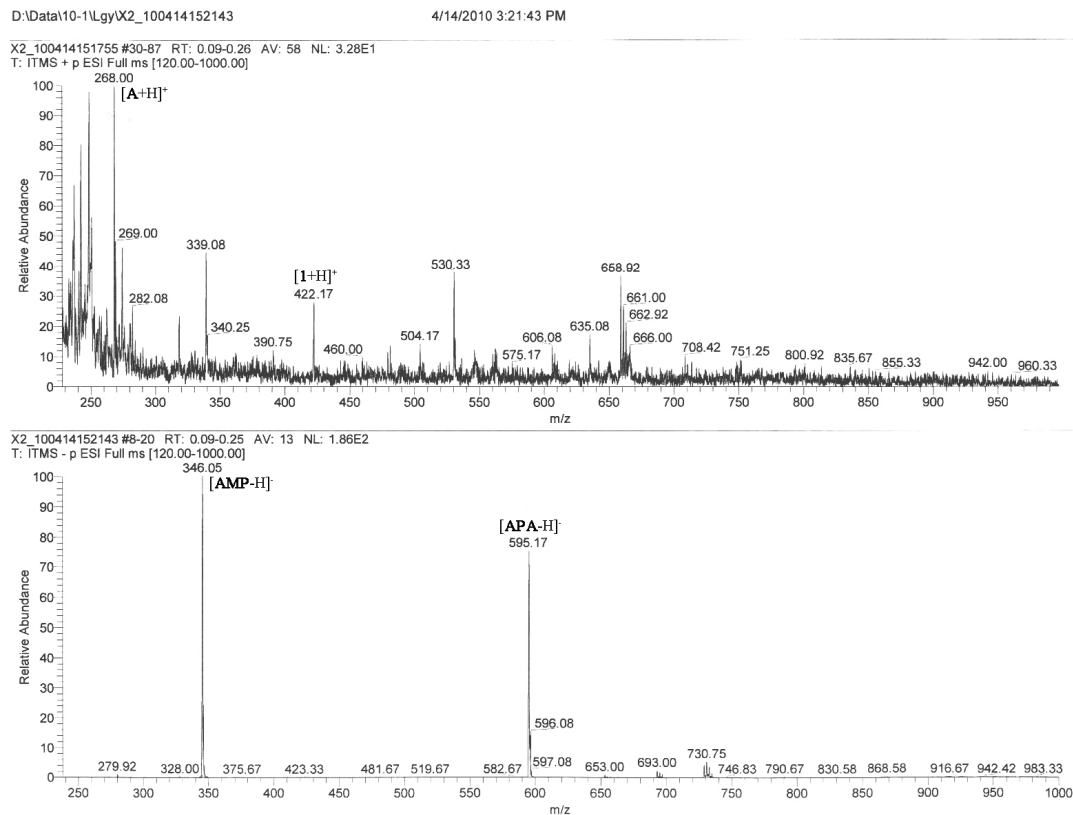

(c)

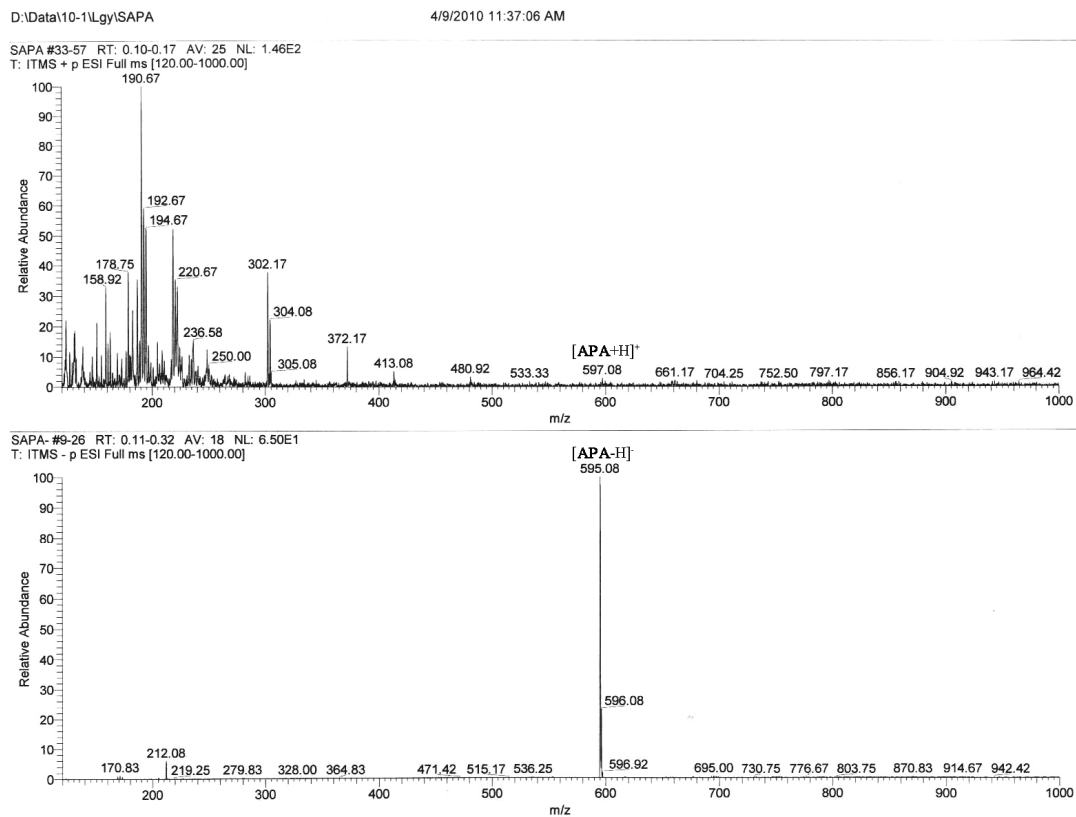

Figure S21. ESI-MS analysis of ApA after treatment with (a) 2, (b) 1 and (c) ApA alone for 16 h at 37 °C.

9. UV-visible spectra and fluorescence emission spectra of compounds 1 and 2

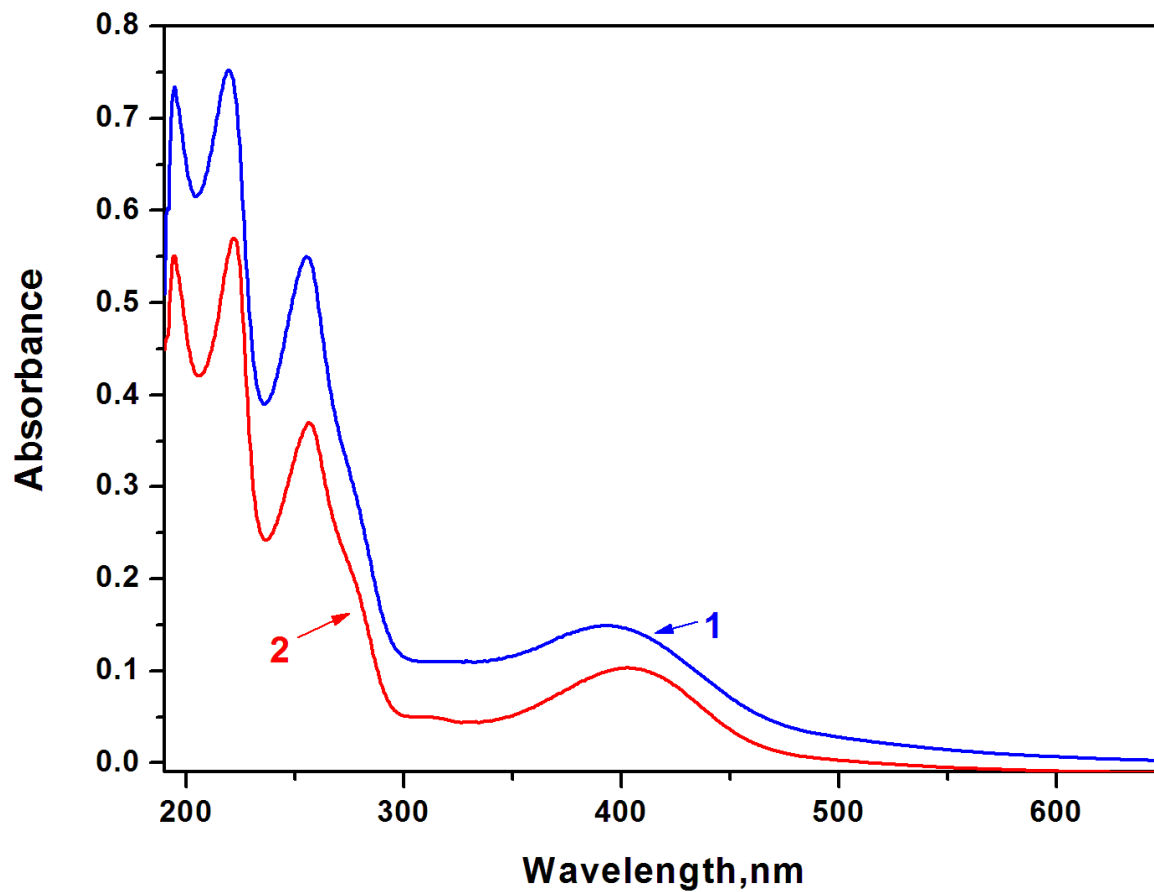

Figure S22. Absorption spectra of compounds 1 (27 $\mu$ M) and 2 (20 $\mu$ M) in pH 7.0 buffer (5mM Tris-HCl) at room temperature.

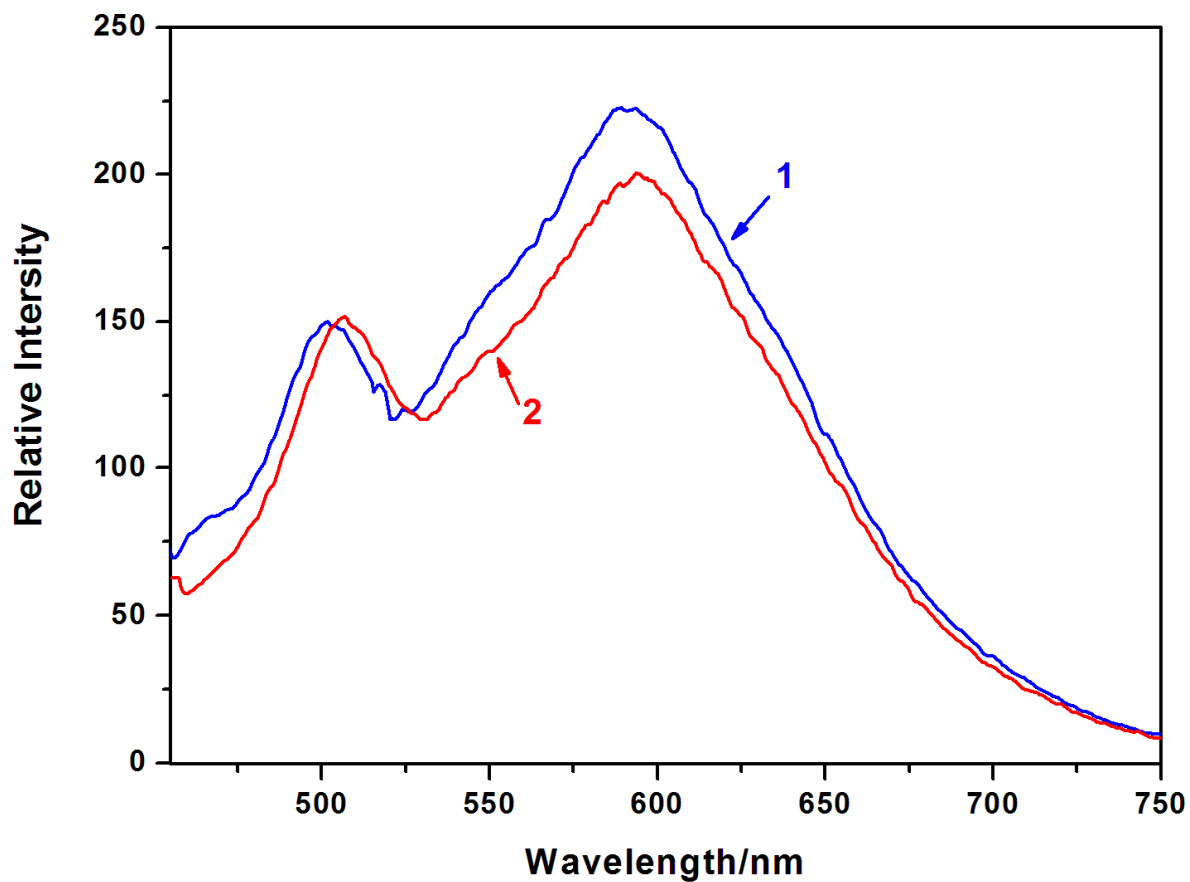

**Figure S23.** Emission spectra of compounds **1** (6.7 $\mu$ M) or **2** (5 $\mu$ M) in 5 mM Tris-HCl buffer (pH 7.0) at room temperature.  $\lambda_{\text{ex}}$  = 430 nm. The photomultiplier voltage is 900. Excitation slit width: 15nm; Emission slit width: 15nm.<sup>b</sup>

<sup>b</sup> The fluorescent spectral studies were performed on an a Perkin-Elmer LS55 luminescence spectrometer.

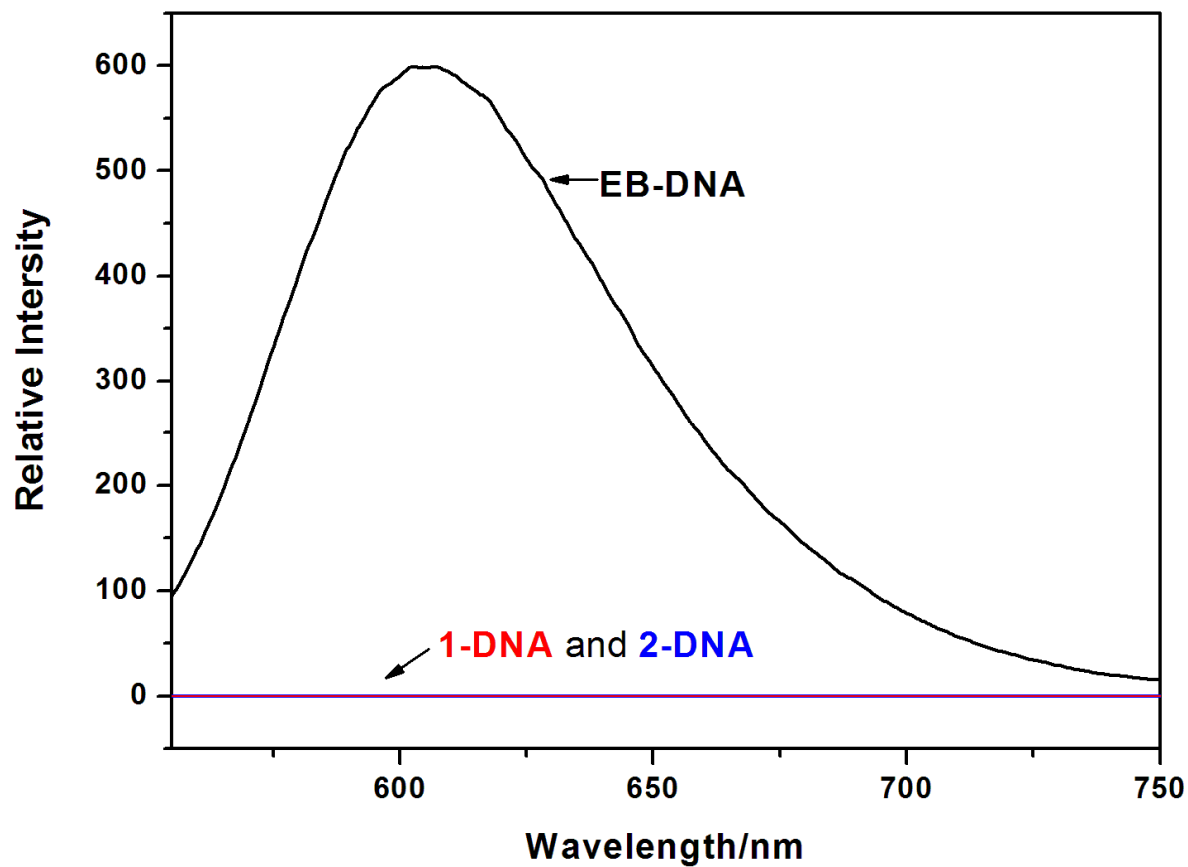

**Figure S24.** Emission spectra of EB-DNA (3.9  $\mu\text{M}$ ), compounds 1-DNA (6.7 $\mu\text{M}$ ) or 2-DNA (5 $\mu\text{M}$ ) in 5 mM Tris-HCl buffer (pH 7.0) at room temperature.  $\lambda_{\text{ex}} = 530$  nm. The photomultiplier voltage is 785. Excitation slit width: 10nm; Emission slit width: 10nm.<sup>b</sup>

<sup>b</sup> The fluorescent spectral studies were performed on an a Perkin-Elmer LS55 luminescence spectrometer.
